## Distinct non-coding RNA cargo of extracellular vesicles from M1 and M2 human primary macrophages

Paschalia Pantazi<sup>1</sup>, Toby Clements<sup>1</sup>, Morten Venø<sup>2</sup>, Vikki M Abrahams<sup>3</sup>, Beth Holder<sup>1\*</sup>

<sup>1</sup> Institute of Reproductive and Developmental Biology, Department of Metabolism, Digestion, and Reproduction, Imperial College London, W12 0HS, UK

<sup>2</sup> Omiics ApS, Aarhus, Denmark

<sup>3</sup> Department of Obstetrics, Gynecology and Reproductive Sciences, Yale School of Medicine, CT 06510, USA

\*Corresponding author

Email addresses:

Paschalia Pantazi ([p.pantazi@imperial.ac.uk](mailto:p.pantazi@imperial.ac.uk))

Toby Clements ([t.clements@imperial.ac.uk](mailto:t.clements@imperial.ac.uk))

Morten Venø ([morten.veno@omiics.com](mailto:morten.veno@omiics.com))

Vikki M Abrahams ([vikki.abrahams@yale.edu](mailto:vikki.abrahams@yale.edu))

Beth Holder ([b.holder@imperial.ac.uk](mailto:b.holder@imperial.ac.uk))

The manuscript is under review with the Journal of Extracellular Vesicles.

## 1 Abstract

2 Macrophages are important antigen presenting cells which can release extracellular vesicles (EVs)  
3 carrying functional cargo including non-coding RNAs. Macrophages can be broadly classified into M1  
4 'classical' and M2 'alternatively-activated' macrophages. M1 macrophages have been linked with  
5 inflammation-associated pathologies, whereas a switch towards an M2 phenotype indicates resolution  
6 of inflammation and tissue regeneration. Here, we provide the first comprehensive analysis of the small  
7 RNA cargo of EVs from human M1 and M2 primary macrophages. Using small RNA sequencing, we  
8 identified several types of small non-coding RNAs in M1 and M2 macrophage EVs including miRNAs,  
9 isomiRs, tRNA fragments, piRNA, snRNA, snoRNA and Y-RNA fragments. Distinct differences were  
10 observed between M1 and M2 EVs, with higher relative abundance of miRNAs, and lower abundance  
11 of tRNA fragments in M1 compared to M2 EVs. MicroRNA-target enrichment analysis identified several  
12 gene targets involved in gene expression and inflammatory signalling pathways. EVs were also enriched  
13 in tRNA fragments, primarily originating from the 5' end or the internal region of the full length tRNAs,  
14 many of which were differentially abundant in M1 and M2 EVs. Similarly, several other small non-coding  
15 RNAs, namely piRNAs, snRNAs, snoRNAs and Y-RNA fragments, were differentially enriched in M1 and  
16 M2 EVs; we discuss their putative roles in macrophage EVs. In conclusion, we show that M1 and M2  
17 macrophages release EVs with distinct RNA cargo, which has the potential to contribute to the unique  
18 effect of these cell subsets on their microenvironment.

19

20 **Keywords:** extracellular vesicles, monocyte-derived macrophages, M1 / M2 macrophages, small non-  
21 coding RNA, small RNA sequencing

22

## 23 Introduction

24 Macrophages are professional antigen presenting cells present in almost all adult tissues. This  
25 heterogenous cell type plays various roles, including defence against pathogens, wound healing, and  
26 regulation of other immune cells. Tissue macrophages comprise both resident cells developed during

27 embryogenesis, and recruited macrophages that are sourced through differentiation and extravasation  
28 of blood monocytes. Macrophages are often classified into two broad subsets: the M1 'classical'  
29 macrophage and the M2 'alternatively-activated' macrophage, which follows the same concept of type  
30 1/2 T cell immunity, and is the most utilised model for the study of macrophage function *in vitro*. M1  
31 macrophages act early against pathogen signals and are involved in inflammatory response, while M2  
32 macrophages have anti-inflammatory properties and help facilitate tissue repair (Reiner, 2009). The  
33 M1/M2 paradigm is an oversimplification of the true complexity of macrophage populations *in vivo*, but  
34 nonetheless has been a beneficial *in vitro* model in the investigation of macrophage biology, and has  
35 been applied to many sites in the human body in which specialised tissue macrophage populations  
36 reside, including the liver (Kupffer cells) (Wan et al., 2014), lungs (alveolar macrophages) (Hu and  
37 Christman, 2019) and the placenta (Hofbauer cells) (Reyes and Golos, 2018). The phenotype is not fixed,  
38 and M1/M2 cells can switch their phenotype upon changes in their microenvironment (Italiani et al.,  
39 2014). The presence of macrophages expressing M1 markers has been linked with inflammation-  
40 associated pathologies such as type 2 diabetes, whereas a switch towards an M2 phenotype in tumour  
41 associated macrophages is pertinent to more aggressive malignancies (Parisi et al., 2018).

42

43 Macrophages both release, and respond to, extracellular vesicles (EVs), the couriers for intercellular  
44 communication (Khalife et al., 2019, Singh et al., 2011, Saha et al., 2017, Yang et al., 2021). EV cargo  
45 consists of various functional molecules including non-coding RNAs (Veziroglu and Mias, 2020),  
46 functional RNA molecules that are not translated into proteins, but regulate gene expression, both *in*  
47 *cis* and *in trans* (Jacob and Monod, 1961). Small non-coding RNAs, which are both present and  
48 functional in immune cell EVs, include microRNAs (miRNA), piwi-interacting RNAs (piRNA), Y-RNA,  
49 transfer RNA (tRNA), small nuclear RNAs (snRNAs) and small nucleolar RNAs (snoRNAs) (Nolte-'t Hoen  
50 et al., 2012). MicroRNAs, and their variants called isomiRs, represent the most thoroughly studied group  
51 of small RNAs. They are found in the genome as individual genes or clusters of several miRNAs and  
52 control gene expression through several mechanisms including translational repression, mRNA

53 deadenylation and degradation (Hammond, 2015). PiRNAs interact with the PIWI subfamily of Argonaut  
54 proteins to preserve genomic stability by repressing the expression of transposable elements, mainly  
55 in the germline (Luteijn and Ketting, 2013). Y-RNAs are encoded by four genes in humans and are  
56 involved in DNA replication initiation, are structural components of riboprotein complexes, and may  
57 also play a role in RNA surveillance and quality control (Kowalski and Krude, 2015). The “house-keeping”  
58 tRNAs, snRNAs and snoRNAs, are involved in the RNA maturation and translation of messenger RNA  
59 (Shen et al., 2018). While tRNAs carry the building blocks of the newly synthesised protein, tRNA  
60 fragments (tRFs), that derive from the cleavage of (pre)tRNAs, were recently discovered and are  
61 implicated in several biological/ cellular processes such as gene expression and stress response  
62 (Schimmel, 2018). The spliceosome associated snRNAs are involved in splicing and the snoRNAs in the  
63 modification of other RNAs (Zhang et al., 2019).

64

65 Given their limited number and inaccessibility from healthy tissues, and the requirement for large  
66 numbers of cells to generate sufficient EVs *in vitro*, comprehensive unbiased information on primary  
67 macrophage EV cargo is lacking. Studies utilising human cell lines, such as THP-1 (Yao et al., 2019), or  
68 murine bone marrow-derived macrophages (Bouchareychas et al., 2020) have provided useful insights  
69 into macrophage EV cargo, but do not fully recapitulate primary human macrophages due to their  
70 immortalisation/requirement for phorbol 12-myristate-induced differentiation, and species  
71 differences, respectively. Most studies involving EVs and macrophages have looked at macrophages as  
72 recipients of EVs from various cellular sources. Studies of EV cargo released from human macrophages  
73 largely focused on proteomics (Cypryk et al., 2014, Cypryk et al., 2017) or miRNA panels (Roth et al.,  
74 2015), while there is also a number of interesting studies that have investigated changes in EV cargo  
75 following viral or bacterial infection (Cypryk et al., 2017, Bhatnagar and Schorey, 2007, Singh et al.,  
76 2015). Here, we have isolated EVs from M1 and M2 monocyte-derived macrophages from healthy  
77 human blood and performed small RNA sequencing to provide a comprehensive insight into the small  
78 RNA cargo of human macrophage M1 and M2 EVs, offering an integral dataset for future research.

79

## 80 **Materials and methods**

### 81 **Monocyte isolation from peripheral blood**

82 Adult human blood was acquired from Research Donors, a HTA licenced and ISO 9001 2015 certified  
83 company with Research Ethics Committee (REC) approval (Reference: 20/LO/0325), purchased via  
84 Cambridge Bioscience. Signed informed consent was obtained. 240mL peripheral blood was collected  
85 from non-fasted healthy female donors (age 21-40 years) into sodium-heparin tubes (Cat. No. 455051,  
86 Greiner BioOne) and transported at room-temperature to the laboratory within 6 hours for processing.  
87 Blood was centrifuged at 400xG for 10min to deplete platelets, followed by peripheral blood  
88 mononuclear cell (PBMC) isolation according to the manufacturer's instructions for Histopaque-1077  
89 (Cat. No. H8889-500ML, Sigma). The buffy coat was collected, diluted with PBS and centrifuged at  
90 600xG for 10min and 400xG for 10min to further deplete platelets. PBMC were seeded at  $1.5 \times 10^6$  cells  
91 per  $\text{cm}^2$  in X-VIVO 10 media (Cat. No. BE04-743Q, Lonza) +1% penicillin-streptomycin (Cat. No. P0781,  
92 Sigma) on tissue culture plates/flasks, and monocytes allowed to adhere for 1 hour. Non-adhered and  
93 weakly attached cells were then removed by vigorous washing with PBS before continuing culture.

94

### 95 **Monocyte-derived M1 and M2 macrophage generation**

96 Macrophage culture was performed under entirely serum-free conditions throughout using X-VIVO 10  
97 media (Cat. No. BE04-743Q, Lonza) supplemented with 1% penicillin-streptomycin (Cat. No. P0781,  
98 Sigma). M1 cells were generated by addition of 20ng/mL of granulocyte-macrophage colony-  
99 stimulating factor (GM-CSF, Cat. No. 572904, BioLegend) and M2 macrophages with 20ng/mL of  
100 macrophage-colony-stimulating factor (M-CSF, Cat. No. 574804, BioLegend). After 6 days, 50% culture  
101 volume of fresh media containing GM-CSF or M-CSF was added. On day 7, to complete the polarisation,  
102 M1 cultures were treated with 20ng/mL of IFN- $\gamma$  (Cat. No. 300-02, Peprotech) and LPS from *Salmonella*  
103 *enterica* (Cat. No. L2137, Sigma), and M2 cells were treated with 20ng/mL IL-4 (Cat. No. 200-04,

104 Peprotech) and IL-13 (Cat. No. 200-13, Peprotech) for 48 hours total, with replacement of media and  
105 treatments after 24 hours (summarised in Figure 1a).

106

### 107 **qPCR for M1 and M2 macrophage phenotyping**

108 Total RNA was isolated from M1 and M2 cells using the RNeasy<sup>TM</sup> RNA Cell Miniprep system (Cat. No.  
109 Z6010, Promega) following the manufacturer's instructions, including a DNase I digestion step. RNA was  
110 quantified at 260nm using a Nanodrop 2000 spectrophotometer and 300ug were used to create a cDNA  
111 library using the High-Capacity RNA-to-cDNA<sup>TM</sup> Kit (Cat. No. 4387406, Applied Biosystems) following the  
112 manufacturer's instructions. Gene expression was determined using TaqMan Gene Expression Assays  
113 containing a FAM dye labelled probe (Applied Biosystems) duplexed with VIC dye labelled probe against  
114 GAPDH (Hs99999905\_m1, Applied Biosystems) as housekeeping expression control. Probe details are  
115 as follows: C-C Motif Chemokine Receptor 7 (CCR7) (Hs01013469\_m1), C-X-C Motif Chemokine Ligand  
116 11 (CXCL11) Hs00171138\_m1), C-C Motif Chemokine Ligand 13 (CCL13) (Hs00234646\_m1), Mannose  
117 Receptor C-Type 1 (MRC1) (Hs00267207\_m1) and C-Type Lectin Domain Family 4 Member L (CD209)  
118 (Hs01588349\_m1). The Sso Advanced<sup>TM</sup> Universal Probes Supermix (Cat. No. 1725281, Bio-Rad) was  
119 used to prepare the reactions and real-time qPCR was performed on a STEP-ONE real-time PCR system  
120 (Cat. No. 4376357, Applied Biosystems).

121

### 122 **Extracellular vesicle isolation**

123 After polarised M1/M2 macrophage cells were established as above, fresh X-VIVO 10 media with 1%  
124 penicillin-streptomycin was added for the 24 hour EV generation period. The conditioned media was  
125 collected and centrifuged at 300xG for 5 minutes to remove floating cells, and then at 1000xG for 10  
126 mins to remove remaining cells/debris. The media was concentrated to 500µL using the Vivaspin 15R  
127 Hydrasart 30,000 MWCO columns (Cat. No. FIL8452, Sartorius). This 500µL was loaded onto qEV  
128 Original (70nm pore) size exclusion chromatography columns (Cat. No. SP1, IZON) in an Automatic

129 Fraction Collector (IZON), and EVs isolated following the manufacturer's instructions, with PBS used as  
130 the buffer. The void volume was 3mL, followed by up to 26x 500µL fractions.

131

### 132 **Nanoparticle tracking analysis (NTA)**

133 EV concentration and size were measured using the ZetaView PMX 120 S (Particle Metrix) with the  
134 standard NTA cell assembly installed, operated using the accompanying software ZetaView 8.05.12 SP2  
135 (Particle Metrix). Samples were diluted in 1mL PBS to obtain a concentration within the recommended  
136 measurement range (50-200 particles/frame), corresponding to dilutions from 1:100 to 1:250. The  
137 instrument captured a 21 second video to measure each sample at 11 different positions, with two  
138 readings at each position. After automated analysis of all 11 positions and removal of any outliers, the  
139 size and the concentration of the sample were calculated by the software. The instrument pre-  
140 acquisition parameters were set to a temperature of 23°C, a sensitivity of 75, a frame rate of 30 frames  
141 per second, a shutter speed of 100, and a laser pulse duration equal to that of shutter duration. Post-  
142 acquisition parameters were set to a minimum brightness of 30, a maximum size of 1000 pixels, a  
143 minimum size of 10 pixels and a trace length of 15. Polymer beads with a uniform size of 100nm (Cat.  
144 No. 3100A, Thermo Fisher) were used to calibrate the instrument prior to sample readings.

145

### 146 **Protein assay and silver stain of EV fractions**

147 Protein was isolated from EVs by addition of RIPA buffer (Cat. No. 10010263, Cayman Chemical)  
148 supplemented with protease (Cat. No. 04693124001, Roche) and phosphatase (Cat. No. 4906837001,  
149 Sigma) inhibitors. Protein was quantified by microBCA assay (Cat. No. 23227, Thermo Fisher), read at  
150 562nm on a Nanodrop spectrophotometer. For silver staining, 9µL of protein from each fraction were  
151 mixed with reducing sample buffer (Cat. No. J61337, Alfa Aesar), heated at 95°C for 5min and separated  
152 on a 10% Bis-Tris gel (Cat. No. WG1203BOX, Invitrogen). Silver staining was performed using the  
153 Pierce™ silver stain kit (Cat. No. 24612, ThermoFisher) following the manufacturer's instructions.

154

155 **Electron microscopy**

156 The EV-enriched fractions (1-3) were combined and concentrated using Amicon Ultra 0.5mL 30kDa cut-  
157 off spin columns (Cat. No. 10012584, Fisher Scientific). 300 mesh continuous carbon support copper  
158 grids (Cat. No. AGG2300C, Agar Scientific) were glow discharged using a Fischione NanoClean Model  
159 1070 instrument. Six microliters of each concentrated sample were applied directly on the grids for 5  
160 min followed by 2% uranyl acetate for 45 sec. The grids were then air dried and imaged using a Tecnai  
161 T12 transmission electron microscope at 120 kVolt.

162

163 **Western blotting**

164 EV and cellular protein (20µg for Calnexin and 5µg for GAPDH blots) was mixed with reducing sample  
165 buffer (Cat. No. J61337, Alfa Aesar), heated at 95°C for 5min and separated on a Bolt 4-12% Bis-Tris gel  
166 (Cat. No. NW04122BOX, Thermo Fisher), alongside a Precision Plus Protein Dual Colour Standard (Cat.  
167 No. 1610374, Bio-Rad). Semi-dry transfer of protein to a nitrocellulose membrane (Cat. No. IB23001,  
168 Thermo Fisher) was performed with the iBlot 2 gel transfer device (Cat. No. IB21001, Thermo Fisher)  
169 using a 7 minute, 20V programme. Membranes were blocked with 1% w/v bovine serum albumin (BSA,  
170 Cat. No. A7906, Sigma) and 5% w/v skimmed milk, and probed with 8ng/mL anti-calnexin antibody (Cat.  
171 No. 2433S, Cell Signalling) overnight followed by 25ng/mL goat anti-rabbit -HRP (Cat. No. P0448,  
172 Agilent) secondary antibody or with 600ng/mL anti-GAPDH directly conjugated with HRP (Cat. No. sc-  
173 47724, Santa Cruz). Signal was detected by incubation with ECL Prime western blotting system (Cat. No.  
174 GERPN2232, GE Healthcare) and measured on an ImageQuant biomolecular imager (Cat. No. LAS4000,  
175 GE Healthcare).

176

177 **ELISA**

178 ELISAs were adapted from Webber et al. (2015). High-binding 96-well ELISA plates (Cat. No. 655061,  
179 Greiner Bio-One) were coated overnight at 4°C with 25µL of SEC fractions 1 to 5 diluted 1:2 with PBS  
180 (Cat. No. LZBE17-512F, Lonza). Wells were washed with 0.05% Tween-20 (Cat. No. P9416, Sigma) in



181 PBS. For intraluminal labelling, the bound EVs were fixed with 4% paraformaldehyde (Cat. No.  
182 20909.290, VWR) for 20 minutes at room temperature, followed by permeabilization with 200 $\mu$ L of  
183 0.1% Triton-X (Cat. No. P9284, Sigma) in PBS for 10 minutes at room temperature prior to staining.  
184 Wells were blocked with 1% BSA (w/v) and 0.05% Tween-20 in PBS for 2 hours at room temperature.  
185 After washing, 100 $\mu$ L per well of the primary antibodies (CD63 (Cat. No. MCA2142, Bio-Rad) and HLA-  
186 ABC (Cat. No. ab70328, Abcam)) or isotype controls were applied at 1mg/mL in 0.1% BSA (w/v) and  
187 0.05% Tween-20 ion for 2 hours at room temperature on a plate shaker set to 400rpm. After washing  
188 as above, 100 $\mu$ L per well of anti-mouse HRP-conjugated antibody (Cat. No. P0447, Agilent Dako) was  
189 applied at 0.1mg/mL in 0.1% BSA (w/v) and 0.05% Tween-20 in PBS for 1 hour at room temperature on  
190 a plate shaker set to 400rpm. After washing as above, TMB substrate (Cat. No. 00-4201-56, Invitrogen)  
191 was added for 15 minutes at room temperature and the reaction quenched by addition of Stop Solution  
192 (Cat. No. MI20031, Microimmune). Absorbance at 450nm was measured on a Molecular Devices  
193 Versamax tuneable plate reader.

194

#### 195 **EV RNA extraction**

196 Based on our demonstration that SEC fractions 1-3 were enriched in EVs and low in protein, indicating  
197 separation of EVs from soluble protein, we combined these for RNA analysis. Total RNA was isolated  
198 from 220 $\mu$ L of the combined SEC fractions, using a Total RNA Purification Kit (Cat No. P4-0058 – 17200,  
199 Norgen), following the supplementary protocol for exosomal RNA. Briefly, 660 $\mu$ L RL Buffer were added  
200 to the EVs followed by 880 $\mu$ L absolute ethanol. The mixture was then applied on the Mini Spin Columns,  
201 washed, DNase I treated (Cat. No. P4-0098 – 25710, Norgen), and eluted in 30 $\mu$ L elution solution. Low  
202 yield samples were subjected to concentration using a SpeedVac (Thermo) at medium speed and no  
203 heat. RNA concentration was measured on an Agilent 2100 Bioanalyzer system using an RNA 6000 pico  
204 chip (Agilent).

205

#### 206 **Library preparation and RNAseq**

207 EV RNA samples were prepared for small RNA sequencing using QIAseq small RNA Library Prep kit  
208 (Qiagen) using a minimum of 1.1 ng RNA per sample. The library preparation method counteracts  
209 amplification bias by adding unique molecular identifier (UMI) on each molecule before amplification  
210 and sequencing, so that uneven PCR amplification can be detected and removed as part of the data  
211 analysis. The finished libraries were quality controlled using an Agilent 2100 Bioanalyzer system and  
212 quantified by qPCR. Libraries were pooled and sequenced on an Illumina NextSeq500 sequencer by  
213 single-end 75bp sequencing.

214

### 215 **Bioinformatic and statistical analysis**

216 The raw data was quality filtered and trimmed by fastx\_toolkit, and adaptor sequences were removed  
217 using Cutadapt. The reads were collapsed to remove identical UMI containing reads. FastQC was used  
218 to ensure high quality sequencing data. Filtered reads were mapped using Bowtie to a list of  
219 transcriptomes. First, reads were mapped to tRNA sequences from Genomic tRNA Database (GtRNAdb)  
220 allowing one mismatch. Unmapped reads were then mapped to miRNAs from miRBase v22 allowing  
221 zero mismatches, but allowing for non-templated 3' A and T bases. Unmapped reads were then  
222 sequentially mapped against other relevant RNA datasets allowing one mismatch: snRNA from  
223 RNAcentral, snoRNA from snoDB, Y RNA from refSeq and Gencode, rRNA from refSeq, piRNA from  
224 RNAcentral, RNA families in Rfam, mRNA from refSeq, followed by the human genome (hg19). This was  
225 done to discover which RNA species were present in the sequencing data. The small RNA expression  
226 profiles generated were used for differential expression analysis in R using the DESeq2 package, and  
227 volcano plots generated using R.

228

### 229 **Further miRNA and tRNA analysis**

230 MicroRNA cluster analysis was performed using the miRNA cluster definitions by miRbase v.22. Clusters  
231 were defined as a set of two or more miRNAs produced from genomic locations within 10 kb in the  
232 genome. For inferring the potential regulation of target genes by the miRNA cargo of M1 and M2 EVs,

233 the MIENTURNET (MicroRNAEnrichmentTURNedNETwork) webtool was utilised  
234 (<http://userver.bio.uniroma1.it/apps/mienturnet/>). This webtool uses data from TargetScan or  
235 miRtarBase and performs statistical analysis for overrepresentation of miRNA-target interactions; we  
236 utilised miRtarBase, which is the most up-to-date tool for validated miRNA-target interactions (Licursi  
237 et al., 2019). All significantly different miRNAs were input (adjusted p value<0.05) for M1 and for M2  
238 EV cargo. Following target enrichment, the top ten miRNAs for each EV subset (based on lowest p value)  
239 were input for functional enrichment analysis. The tRNA fragments were annotated, using the  
240 annotate\_tRF function of the R package MINTplates designating tRNA originating sequences with a  
241 MINTbase ID, also called tRF label or "License Plates" nomenclature. Furthermore, tRNA sequences are  
242 annotated by originating tRNA and fragment type: 5'-half, 5'-tRF, i-tRF, 3'tRF and 3'-half per MINTbase  
243 definitions (Pliatsika et al., 2018).

244

## 245 Results

### 246 Generation of polarised M1 and M2 monocyte-derived macrophages

247 M1 and M2 macrophages were successfully generated by culture in the presence of GM-CSF followed  
248 by IFN- $\gamma$  and LPS, or M-CSF followed by IL-13 and IL-4, respectively (Figure 1a). They had the expected  
249 morphology, with M1 cells being more adherent and dendritic-like, and M2 being more heterogenous,  
250 with a proportion of cells displaying a 'fried egg' appearance (Bertani et al., 2017)(Figure 1b). Real time  
251 qPCR profiling of the cells for previously reported M1 and M2 markers (Martinez et al., 2006) confirmed  
252 their polarisation; M1 cells had significantly increased expression of the M1 markers CXCL11 (397x fold)  
253 and CCR7 (10.5x fold) compared to M2 cells (Figure 1c), whilst M2 cells had significantly higher  
254 expression of the M2 markers CCL13 (406x fold), MRC1 (10.1x fold) and CD209 (8.6x fold) compared to  
255 M1 cells (Figure 1d). Based on these data, we proceeded to EV generation.

256

### 257 Characterisation of M1 and M2 macrophage EVs

258 M1 and M2 macrophage EVs were characterised, including reference to the Minimal information for  
259 studies of EVs 2018 (They et al., 2018) and the EV-TRACK database (Consortium et al., 2017). This study  
260 is registered on EV-TRACK with reference number EV220120. Nanoparticle tracking analysis (NTA) and  
261 protein assay showed that EVs were enriched in the SEC fractions 1-3 following the void, and were  
262 separated from the increased protein amounts observed from fraction 8 onwards, indicating the  
263 appearance of soluble protein (Figure 2a). This increase in free protein in later fractions was also shown  
264 by silver staining (Figure 2b). Based on these data, fractions 1-3 were combined for subsequent  
265 analyses, providing a mean EV count of  $1.12 \times 10^8$  particles/million starting PBMC for M1 cells and  
266  $3.95 \times 10^7$  particles/million starting PBMC for M2 cells (Figure 2c). EVs isolated from M1 cells were  
267 slightly but statistically significantly larger than EVs from M2 cells ( $p=0.007$ ), with an average median  
268 ( $\pm$ SD) size of 165.4nm ( $\pm 11.71$ ) for M1 EVs and 156.4nm ( $\pm 6.79$ ) for M2 EVs (Figure 2d). A representative  
269 size distribution of EVs from primary macrophages is shown in Figure 2e. Transmission electron  
270 microscopy confirmed EV phenotype, including an abundance of EVs presenting with the classical 'cup-  
271 shaped' morphology (Lobb et al., 2015) (Figure 2f). In our EV preparations, the canonical EV/exosome  
272 markers CD63, HLA-A and GAPDH were enriched in fractions 1-3 as measured by ELISA or western blot  
273 (Figure 2g-h), while the absence of the negative EV marker calnexin was assessed by western blotting  
274 (Figure 2h).

275

### 276 **M1 macrophage EVs have a higher proportion of miRNAs and lower proportion of tRNA fragments** 277 **compared to those from M2 macrophages**

278 Sequencing performed on small RNA libraries prepared from EVs produced by M1 and M2  
279 macrophages, detected miRNAs, isomiRNAs, tRNAs, piRNAs, snRNAs, snoRNAs and Y-RNAs (Figure 3a).  
280 Classifying the sequenced RNAs revealed several distinct features of the composition of small RNAs and  
281 RNA fragments in M1 and M2 EVs (Figure 3a-b). In M1 EVs, miRNAs were the most abundant subclass,  
282 making up 58% of the small RNAs, compared to 34% in M2 macrophage EVs ( $p<0.01$ ; Figure 3b). The  
283 next most abundant small RNA subclass was tRNA fragments, which was also significantly differentially

284 abundant in M1 and M2 EVs, making up 45% of the small RNAs in M2 compared to 23% of small RNAs  
285 in M1 EVs ( $p < 0.01$ ; Figure 3b). The remaining RNA species, isomiRs, piRNA, snRNA, snoRNA, and Y-RNA  
286 made up the 3.2%, 4.3%, 1.3%, 0.2%, and 10% of all small RNAs in M1 macrophage EVs, and the 4.1%,  
287 8.2%, 1.8%, 0.2% and 7.1% of all small RNAs in M2 macrophage EVs, respectively.

288

### 289 **Distinct miRNA profiles in EVs from M1 and M2 macrophages**

290 471 miRNAs were detected in M1/M2 macrophage EVs (Supplemental Table 1). The ten most abundant  
291 miRNAs in M1 EVs were let-7a-5p, let-7f-5p, let-7i-5p, miR-16-5p, miR-21-5p, miR-26-5p, miR-142-3p,  
292 miR-146a-5p, miR-146b-5p and miR-155-5p (Figure 4a). The ten most abundant miRNAs in M2 EVs were  
293 let-7a-5p, let-7b-5p, let-7i-5p, miR-16-5p, miR-21-5p, miR-92a-3p, miR-142-3p miR-146a-5p, and miR-  
294 486-5p (Figure 4a). Seven of these top ten were shared between the EVs from the two cell types (let-  
295 7a-5p, let-7f-5p, let-7i-5p, miR-16-5p, miR-21-5p, miR-142-3p, miR-146a-5p). In all cases, these were  
296 more abundant in M1 EVs compared to those from M2, reaching statistical significance for let-7i-5p  
297 and miR-146a-5p (Supplemental Table 2). Of the 471 miRNAs found in macrophage EVs, 72 were  
298 significantly differentially abundant between M1 and M2 macrophage EVs (Supplemental Table 2;  
299 Figure 4b), with 43 higher in M1 EVs, and 29 higher in M2 EVs (Figure 4b). MicroRNAs from M1 and M2  
300 macrophage EVs form separate clusters by principal component analysis (Figure 4c).

301

302 We report all members of the let-7 family in macrophage EVs, except miR-202; with let-7a, let-7f and  
303 let-7i being within the top ten most abundant miRNAs in both M1 and M2 EVs. Let-7d-5p, let-7e-5p,  
304 let-7i-3p and let-7i-5p were significantly higher in M1 EVs, whilst let-7d-3p was significantly higher in  
305 M2 EVs. Finally, miRNA profiles were analysed for miRNA clusters, defined as two or more miRNAs  
306 produced from genomic locations within 10 kb. Of the 159 clusters reported by miRbase (v22), 35  
307 clusters were found in M1/M2 macrophage EVs (data not shown). Of these, only one cluster - the miR-  
308 99b/let-7e/miR-125a cluster - was notably different between M1 and M2 EVs, with all three miRNAs  
309 present in M1/M2 EVs and all miRNAs being significantly more abundant in M1 EVs compared to M2

310 (Figure 4d). Moreover, both the 5' and 3' forms of miR-125a and miR-99b were present and  
311 differentially abundant.

312

### 313 **Functional enrichment analysis reveals contrasting targets of M1 and M2 miRNA EV cargo**

314 The gene targets of the miRNA cargo within M1 and M2 EVs were identified using the MIENTURNET  
315 webtool (Licursi et al., 2019), looking for overrepresentation of miRNA-target interactions, based on  
316 validated miRNA-target interactions from miRTarBase. The top 20 targets of M1 and M2 EVs are shown  
317 in Figure 5a-b, and the individual miRNAs targeting these genes are listed in Supplemental Table 3. The  
318 top 20 M1 EV miRNA targets include cytokines/chemokines (Interleukins 6 and 8 (IL-6/8) and genes  
319 involved in protein trafficking (Sortilin 1 (SORT1), RP2 Activator of ARL3 GTPase (RP2)) and cell  
320 proliferation (Microtubule Associated Scaffold Protein 1 (MTUS1), Maternally Expressed 3 (MEG3), A-  
321 Kinase Anchoring Protein 8 (AKAP8)). Of note, the Mechanistic Target Of Rapamycin Kinase (MTOR) is  
322 one of the top targets for M1 EV miRNA cargo, being targeted by five miRNAs. The top 20 M2 EV miRNA  
323 targets include genes involved in transcriptional regulation (Mitogen-Activated Protein Kinase  
324 (MAP3K3), Mortality Factor 4 Like 1 (MORF4L1), B-TFIID TATA-Box Binding Protein Associated Factor 1  
325 (BTAF1), SIN3 Transcription Regulator Family Member B (SIN3B), MYC Proto-Oncogene (MYC),  
326 Forkhead Box O3 (FOXO3)), oxidative stress (Nth Like DNA Glycosylase 1 (NTHL1), Paraoxonase 2  
327 (PON2)), and NFκB signalling (MAP3K3 and TNF Receptor Associated Factor 4 (TRAF4)). MYC is a top  
328 gene target for both M1 and M2 miRNA EV cargo, with ten of the miRNAs upregulated in M1 EVs  
329 targeting this gene, compared to eight of those in M2 EVs (Supplemental Table 3). Furthermore, top  
330 targets of both also include genes involved in regulation of MYC activity; M1 EV miRNAs target Far  
331 Upstream Element Binding Protein 1 (FUBP), which can activate and repress MYC transcription, whilst  
332 M2 EV miRNAs target SIN3 Transcription Regulator Family Member B (SIN3B) which represses MYC-  
333 responsive genes, and FOXO3 which can prevent MYC translation.

334

335 KEGG functional enrichment analysis using the top ten miRNAs present following the target enrichment  
336 above identified several interesting biological pathways (Figure 5c-d). For both M1 and M2 EV miRNA  
337 cargo, this included potential regulation of the forkhead box (FoxO), the phosphoinositide-3-kinase–  
338 protein kinase B/Akt (PI3K/Akt), and mitogen-activated protein kinases (MAPK) signalling pathways. M1  
339 EV miRNA cargo, additionally potentially regulates the JAK-STAT and HIF-1 pathways, as well as  
340 autophagy and the cell cycle (Figure 5c). M2 EV miRNA cargo additionally potentially regulates TGF- $\beta$ ,  
341 Hippo, p53, GnRH, and Toll-like receptor signalling pathways, as well as senescence, and cytosolic DNA  
342 sensing (Figure 5d).

343

#### 344 **Distinct profiles of tRNA fragments in EVs from M1 and M2 macrophages, including higher proportion** 345 **of 5'-halves and 5'-tRFs in M1 EVs**

346 Transfer RNA fragments were classified using MINTmap annotations (Loher et al., 2017), identifying  
347 22,600 tRFs in M1/M2 macrophage EVs (Supplemental Table 4). We classified tRFs into five structural  
348 categories by their derivation from full-length mature tRNAs: 5' halves (5'-half), 3' halves (3'-half),  
349 shorter sequences from the 5' region (5'-tRF), shorter sequences from the 3' region (3'-tRF), and those  
350 from the internal region (i-tRF) (Kumar et al., 2016)(Figure 6a). The vast majority of tRNAs present in  
351 both M1 and M2 EVs were i-tRFs (90.3%; 20,479), followed by 5'tRFs (5.8%; 1,307) and 5'halves (1.5%;  
352 261). Only two 3'-tRFs were identified (the tRF-16-K69YRVD in M2 EVs and the tRF-16-KQ7871B in M1  
353 EVs – nomenclature based on MINTbase ID), and no 3'-halves. M1 macrophage EVs contained a higher  
354 number of 5'-halves (1.3x fold, p=0.046) and 5'-tRFs (1.4x fold, p=0.024) compared to M2 macrophage  
355 EVs (Figure 6b). 34 tRFs were significantly more abundant in M1 macrophage EVs, and 32 were more  
356 abundant in M2 macrophage EVs (Figure 6c; Supplemental Table 5). Of the differentially abundant tRFs,  
357 most were again i-tRFs (70% in M1 and 63% in M2), but there was a higher representation of 5'tRFs  
358 (18%/39%) and 5'-halves (12%/13%) compared to all identified tRFs. M1 EVs were more enriched in  
359 tRFs deriving primarily from tRNA-Leu (n=6), tRNA-Asp (n=6), tRNA-His (n=6), and tRNA-Val (n=4), while  
360 M2 EVs were more enriched in fragments from tRNA-Glu (n=13), tRNA-Asp (n=6), and tRNA-Arg (n=5).

361

362 **piRNA, snRNA, snoRNA and Y-RNA cargo of M1 and M2 macrophage EVs**

363 A total of 7,059 piRNAs were identified in M1/M2 macrophage EVs (Supplemental Table 6), with 147 of  
364 these detected in all M1 EV samples and 74 in all M2 samples. The top two most abundant piRNAs were  
365 the same in M1 and M2 EVs- piR-33151 and piR-44757- with a further four found in the top ten of both  
366 EV subsets (piR-32017, piR-33151, piR-41603, piR-44757, piR-49143, piR-49144). Six piRNAs were  
367 differentially abundant between M1 and M2 EVs (piR-49645, piR-36041, piR-53542, piR-57947, piR-  
368 36038, piR-31355); all of which were increased in M1 EVs compared to M2 EVs (Figure 7a; Supplemental  
369 Table 6).

370

371 45 snRNAs were identified in M1/M2 macrophage EVs (Supplemental Table 7). The most abundant  
372 snRNA was the same in both M1 and M2 EVs - RNU2-1 - with a further five found in the top ten of both  
373 EV subsets (RNU1-4, RNVU1-28, RNVU1-31, RNU4-1, RNU5B-1, RNVU1-7). Eight snRNAs were  
374 differentially abundant between M1 and M2 EVs (Figure 7b; Supplemental Table 7). Two of these  
375 (RNU11 and RNU6-1) were more abundant in M1 EVs, and six (RNVU1-19, RNVU1-34, RNVU1-2A,  
376 RNVU1-22, RNVU1-7, RNVU1-1) were more abundant in M2 EVs.

377

378 1,491 snoRNAs were identified in M1/M2 macrophage EVs (Supplemental Table 8), with 434 of these  
379 detected in all M1 EV samples and 114 in all M2 samples. 107 snoRNAs were differentially abundant  
380 between M1 and M2 EVs, with 23 more abundant in M1 and 84 more abundant in M2 EVs (Figure7c).  
381 SnoRNAs are divided into three subclasses; C/D box snoRNAs (SNORD), H/ACA box snoRNAs (SNORA),  
382 and small Cajal body-specific RNAs (SCARNA) (Xie et al., 2007). The most differentially abundant  
383 snoRNAs were SNORDs (n=42), followed by SNORAs (n=34) and then SCARNAs (n=7). Of the  
384 differentially abundant SNORDs, half were more abundant in M1 EVs, and half were more abundant in  
385 M2 EVs (n=21 for each), whereas all but one of the SNORAs (SNORA73B) were higher in M2 EVs, and all  
386 the SCARNAs were higher in M2 EVs.



387

388 631 Y-RNA derived small RNAs were identified in M1/M2 macrophage EVs (Supplemental Table 9), with  
389 106 of these detected in all M1 EV samples and 28 in all M2 samples. 31 Y-RNAs were differentially  
390 abundant between M1 and M2 EVs, with 6 higher in M1 and 25 higher in M2 EVs (Figure 7d).

391

## 392 **Discussion**

393 Here, utilising fully polarised human monocyte-derived macrophages, cultured under serum-free  
394 conditions, we report the comprehensive small RNA cargo of EVs from M1 pro-inflammatory  
395 macrophages and M2 pro-resolution macrophages; the most common model of human tissue  
396 macrophages. Broadening existing knowledge on macrophage RNA cargo, which has hereto focused  
397 largely on miRNAs, we demonstrate that M1 and M2 cells produce EVs with both common and  
398 disparate miRNA, tRNA, piRNA, snRNA, snoRNA and Y-RNA cargo. Our identification of multiple EV small  
399 RNAs specifically associated with pro-inflammatory and pro-resolution macrophage phenotype furthers  
400 our mechanistic understanding of macrophage modulation of surrounding cells and tissues.

401

402 We found that M1 macrophages release EVs of a larger size than M2 macrophages. The biological  
403 significance of this is unclear; potentially reflecting an increased production of larger microvesicles from  
404 these cells compared to smaller exosomes. We are currently investigating the proteomic cargo of  
405 M1/M2 EVs, which could help answer this question. The apparent increased amount of EVs released  
406 from M1 cells could be attributed to the higher cell numbers consistently seen by the end of the  
407 polarisation protocol in M1 cultures, likely due to greater adhesion of these cells to the culture plastic  
408 (as shown in Figure 1b). It was only possible for us to report EV concentrations relative to seeding cell  
409 numbers, as following polarisation, we found that it was not possible to successfully detach the cells  
410 without excessive loss, which precluded calculating final cell numbers.

411

412 Looking at the overall relative abundance of small RNA cargo in all donors, the most abundant type was  
413 miRNA, followed by tRNA fragments, as previously reported for EVs (O'Brien et al., 2020). We observed  
414 a higher proportion of miRNA and smaller proportion of tRFs in M1 EVs compared to M2 EVs.  
415 Macrophage differentiation in the presence of TLR-4 ligand lipopolysaccharide (LPS), as used in our M1  
416 protocol, can promote miRNA biosynthesis through upregulation of full-length Dicer (Curtale et al.,  
417 2019), although notably, this same study also reported equal upregulation of Dicer in human monocytes  
418 differentiated to M1 and M2 . We detected a significant relative decrease in tRFs in M1 EVs, which  
419 could simply reflect the relative increase in miRNAs in these EVs, as tRNA was the second most  
420 abundant RNA type, and we saw equal numbers of tRNA fragments increased in M1 and M2 EVs.

421

422 MicroRNAs are important regulators of macrophage activation and polarisation (Curtale et al., 2019).  
423 We identify a range of miRNA cargo (>400 unique miRNAs) within EVs released from M1 and M2  
424 macrophages, with distinct clustering of M1 and M2 EV miRNA profiles. Of the 72 differentially  
425 expressed miRNAs, several have been associated with macrophage polarisation (Zhang et al., 2013),  
426 including upregulation of miR-155 and miR-181a in M1 EVs. However, we also found that EV profiles  
427 did not always reflect previously reported cellular changes; for example we found higher miR-143-3p  
428 and miR-145-5p in M2 EVs, in agreement with reported cellular changes, but significantly lower miR-  
429 125-5p and miR-146a-3p, in disagreement (Zhang et al., 2013). This could reflect differences between  
430 human monocyte-derived macrophages (mo-macrophages) studied here, and murine bone marrow-  
431 derived macrophages studied by Zhang et al., or could indicate selective shuttling of miRNAs from cells  
432 into EVs.

433

434 The miR-155 is one of the most studied miRNAs in macrophages, and within the immune system in  
435 general; widely reported to increase under inflammatory conditions, and decrease under pro-  
436 resolution conditions (Alivernini et al., 2017). Although we indeed report higher expression of miR-155-  
437 5p in M1 EVs, several other miRNAs had a greater difference between M1 and M2 EVs. The miRNA with

438 the highest increase (>20x fold-change) in M1 EVs - miR-187-3p - was previously reported to be  
439 upregulated in monocytes and mo-macrophages following LPS exposure in an IL-10-dependent manner  
440 (Rossato et al., 2012).

441

442 The highly conserved let-7 family is among the most abundantly expressed miRNAs in cells, and we  
443 report all members of this family in macrophage EVs (except miR-202), with let-7a/let-7f /let-7i being  
444 in the top ten most abundant miRNAs in both M1 and M2 EVs. The let-7 family play roles as tumour  
445 suppressors, in metabolic reprogramming and in immune system development (Roush and Slack, 2008).  
446 In macrophages, let-7c (Banerjee et al., 2013) and let-7b (Wang et al., 2016) are involved in macrophage  
447 polarisation, though we find these to be similarly abundant in M1 and M2 EVs. LPS treatment of human  
448 monocyte/macrophages upregulates the let-7 containing miRNA cluster miR-99b-5p/let-7e-5p/miR-  
449 125a-5p (Basavarajappa et al., 2020, Curtale et al., 2018). We report here for the first time that this  
450 cluster is also released by macrophages via EVs; indeed, it was the sole miRNA cluster significantly  
451 increased in EVs from M1 macrophages. Release of this cluster via EVs could be a mechanism by which  
452 M1 macrophages induce M1 polarisation in bystander cells, in addition to known soluble factors such  
453 as cytokines.

454

455 Given the large number of miRNAs significantly different between M1 and M2 EVs, we performed target  
456 enrichment analysis (Licursi et al., 2019) to investigate the targets of the complete EV miRNA cargo.  
457 Top targets of M1 EV-miRNA cargo included IL-6 and IL-8. and several genes involved in cell  
458 proliferation, such as the Microtubule Associated Scaffold Protein 1 (MTUS1), the Maternally expressed  
459 3 (MEG3) and the A-Kinase Anchoring Protein 8 (AKAP8). MEG3 is a long non-coding RNA (lncRNA),  
460 which modulates the TGF- $\beta$  pathway (Mondal et al., 2015), and TGF- $\beta$  regulates macrophage activation,  
461 cytokine production and chemotaxis (Murray et al., 2014). Interestingly, Mechanistic Target Of  
462 Rapamycin Kinase (MTOR) is targeted by five of the top 20 M1 EV miRNAs. This serine/threonine protein  
463 kinase is a central regulator of cellular metabolism, growth and survival in response to hormones,

464 growth factors, nutrients, energy and stress signals (Maiese, 2020). Together with numerous other  
465 interesting targets, miRNAs found in both M1 and M2 EVs target the MYC Proto-Oncogene (MYC),  
466 required for M2 polarisation (Pello et al., 2012). Thus, the EV miRNA cargo reflects the phenotype of  
467 the source macrophage, and represents potential mediators of functional effects in surrounding cells  
468 and tissues.

469

470 KEGG functional enrichment analysis identified that M1 and M2 EV cargo could potentially regulate the  
471 FoxO, PI3K/Akt, and MAPK signalling pathways. FoxO regulates many cellular processes such as cell  
472 cycle, apoptosis, metabolism and oxidative stress and immune regulation, and is regulated by the  
473 PI3K/Akt pathway (Matsuzaki et al., 2003). The PI3K/Akt pathway also mediates numerous cellular  
474 functions including angiogenesis, metabolism, growth, proliferation, survival, protein synthesis,  
475 transcription, and apoptosis (Hemmings and Restuccia, 2015). Finally, the equally complex MAPK  
476 signalling pathway regulates cell cycle and proliferation, and plays a key role in the immune system  
477 (Dong et al., 2002). In addition to these pan-macrophage miRNA-EV targets, M1 EV miRNA cargo  
478 additionally regulates the JAK-STAT and HIF-1 pathways, involved in immunity and hypoxic responses  
479 respectively. M2 EV miRNA cargo additionally potentially regulates TGF- $\beta$  and Toll-like receptor  
480 signalling pathways, and cytosolic DNA sensing; all important for macrophage responses to pathogen  
481 encounter.

482

483 In agreement with previous studies on dendritic cells (Nolte-'t Hoen et al., 2012) and T cells (Chiou et  
484 al., 2018), we report here the relative high abundance of tRFs in macrophage EVs. As shown in EVs from  
485 other cell types (Chiou et al., 2018, Cooke et al., 2019), M1 and M2 macrophage EVs contained primarily  
486 fragments of the 5' end i.e., 5'halves and 5' tRFs, as well as itRFs. Natural or synthetic 5' tRFs and not  
487 3'-tRFs can initiate a stress response involving the assembly of stress granules (Emara et al., 2010),  
488 suggesting that 5' tRFs may be packaged in EVs as a result of cell stress, or cell activation, as in the case  
489 of T cells (Chiou et al., 2018). This process might be a step towards purging the excess cellular RNA or

490 transferring specific messages to other cells. Interestingly, angiogenin, a ribonuclease activated by  
491 stress responses and responsible for the anticodon cleavage of tRNAs, has also been found in EVs,  
492 indicating that tRNA cleavage may also take place within EVs (Wei et al., 2017).

493

494 Various fragments of tRNA-Gly, tRNA-Asp, and tRNA-Glu were found within the most upregulated tRFs  
495 in both M1 and M2 EVs. Fragments of these tRNAs have previously been reported in EVs of various  
496 sources including cell lines (Sork et al., 2018, Wei et al., 2017), bone marrow- and adipose-  
497 mesenchymal stem cells (Baglio et al., 2015), placenta (Cooke et al., 2019), semen (Vojtech et al., 2014),  
498 plasma, serum, urine and bile (Srinivasan et al., 2019), and have been implicated in gene silencing by  
499 sequestering the Y-Box Binding Protein 1 (YBX1) (Goodarzi et al., 2015). Specifically, Goodarzi et al.  
500 (2015) showed that these YBX1-antagonistic tRFs dislocate YBX1 from the 3'untranslated region of  
501 oncogenic transcripts in breast cancer cells, leading to suppression of tumour growth and metastasis.  
502 Some of these tRF targets include the Eukaryotic translation initiation factor 4 gamma 1 (EIF4G1), the  
503 Integrin subunit beta 4 (ITGB4), and the Serine/threonine-protein kinase 1 (AKT1), which are involved  
504 in multiple cell functions outside of the context of cancer. Whether these tRFs can be delivered by EVs  
505 and exert their functions in recipient cells is unknown.

506

507 We report 34 tRFs that were significantly more abundant in M1 macrophage EVs compared to M2 EVs.  
508 These included 5' end or internal fragments of tRNA-Leu(CAG, CAA, TAA), tRNA-Asp(GTC), tRNA-  
509 His(GTG), tRNA-Val(CAC and AAC), tRNA-Trp(CCA), tRNA-Met(CAT), tRNA-Gln(CTG), tRNA-Glu(TTC and  
510 CTC), tRNA-Gly(CCC), tRNA-Lys(CTT). Activated CD4<sup>+</sup> T cells release EVs that are enriched in 5'tRFs  
511 derived from the tRNA-Leu (TAA and TAG), suggesting specific EV cargo loading in response to  
512 stimulation (Chiou et al., 2018), which might also be the case for macrophages. Li et al. (2016), showed  
513 that cleavage of tRNA-Val(CAC) by angiogenin was augmented during ischemic injury and hypoxia, and  
514 5' tRFs of this tRNA inhibit proliferation, migration and the tube formation capacity of endothelial cells,  
515 suggesting that the 5'tRF-Val(CAC) might have anti-angiogenic properties, in line with the

516 characteristics of M1 macrophages. Fragments of the 5' end of tRNA-Gly(CCC), tRNA-Lys(CTT), and tRNA-  
517 Glu(CTC) favour respiratory syncytial virus (RSV) replication in cell lines by suppressing host defence  
518 genes like the apolipoprotein E receptor 2 (APOER2) (Wang et al., 2021, Deng et al., 2015). The  
519 functional implications of the overrepresentation of these tRFs in M1 macrophage EVs is yet to be  
520 investigated.

521

522 We found 32 tRFs to be significantly more abundant in M2 macrophage EVs compared to M1 EVs. These  
523 included 5' end or internal fragments of tRNA-Glu(TTC and CTC), tRNA-Asp(GTC), tRNA-Arg(TCT, CCG,  
524 ACG), tRNA-Gly(GCC and CCC), tRNA-Lys(TTT), tRNA-Cys(GCA), tRNA-Phe(GAA), tRNA-Ile(AAT). Eight  
525 different itRFs arising from the tRNA-Glu(TTC) were found in M2 EVs, three of which (sequences ~ 36-  
526 69) were approximately 32-fold more abundant in M2 EVs. Different fragments of the tRNA-Glu(TTC)  
527 had previously been characterised as tumour-suppressors in gastric and thyroid cancers, likely involved  
528 in MAPK signalling (Xu et al., 2021, Shan et al., 2021).

529

530 Fragments of several lengths can be produced from the same tRNA. For example, in our dataset we  
531 observed various itRFs from the tRNA-His(GTG) including the sequences 2-24, 10-33, 15-34, etc. Each  
532 of these itRFs might be involved in different biological processes. This highlights the need for  
533 standardised nomenclature for the different tRFs to enable inter-study comparisons and meta-analyses.  
534 The clinical significance of tRNAs and tRFs in EVs has recently been reviewed by Liu et al. (2022) and  
535 Weng et al. (2022).

536

537 In addition to miRNAs and tRFs, we also identified other small non-coding RNAs in M1 and M2  
538 macrophage EVs, including Y-RNAs, followed by piRNAs, snRNAs and snoRNAs. Y-RNA derived small  
539 RNAs have been reported in EVs from various sources, including immune cells (Nolte-'t Hoen et al.,  
540 2012, Driedonks et al., 2018), cancer cells (Tosar et al., 2015, Lunavat et al., 2015), and body fluids (Yeri  
541 et al., 2017, Dhahbi et al., 2014, Vojtech et al., 2014), and sustain immunomodulatory properties

542 (Haderk et al., 2017). More specifically, Y-RNA gene 4 (RNY4), present in the circulating EVs of patients  
543 with chronic lymphocytic leukemia, triggers the expression of the Programmed Death Ligand 1 (PDL-1)  
544 in monocytes, leading to immune-suppression (Haderk et al., 2017). In our dataset, RNY4 was more  
545 abundant in M2 macrophage EVs compared to M1 EVs, further supporting its anti-inflammatory role.  
546 PiR-33151 and piR-44757 were the two most abundant piRNAs in both M1 and M2 EVs. Upregulation  
547 of piR-33151 occurs in plasma and plasma EVs in patients with amyotrophic lateral sclerosis and chronic  
548 thromboembolic pulmonary hypertension, respectively (Joilin et al., 2020, Lipps et al., 2019). Little is  
549 known about the function of piR-44757, except for its possible role as an enhancer of the Myeloid  
550 differentiation primary response 88 (MYD88) expression, a protein adapter that facilitates signal  
551 transduction between immune cells (Fishilevich et al., 2017, Deguine and Barton, 2014). The most  
552 abundant snRNA in both M1 and M2 EVs was RNU2-1. Fragments of RNU2-1 are elevated in the blood  
553 of patients with central nervous system lymphomas (Baraniskin et al., 2016), melanoma (Kuhlmann et  
554 al., 2015), ovarian cancer (Kuhlmann et al., 2014), pancreatic and colorectal adenocarcinoma  
555 (Baraniskin et al., 2013), however the function of these RNAs and RNA fragments as well as their targets  
556 remain to be explored. Lastly, we identified several snoRNAs, including SNORDs, which drive  
557 methylation of rRNAs, SNORAs, which drive pseudo uridylation of rRNAs, and SCARNAs which facilitate  
558 methylation or pseudo uridylation of snRNAs and are localised to the Cajal body (Lafontaine and  
559 Tollervey, 1998, Darzacq et al., 2002). The snoRNA content of immune cell derived EVs changes in  
560 response to stimulatory or suppressive signals (Rimer et al., 2018). Specifically, activation of  
561 macrophages with lipopolysaccharide (LPS) results in accumulation of the SNORDs 32a, U33, U34, and  
562 U35a in secreted EVs, without accumulation in the cytoplasm, and uptake of these SNORDs occurs in  
563 distant tissues *in vivo*, resulting in modification/ methylation of their RNA targets (Rimer et al., 2018).  
564 We did not observe any statistically significant differences regarding these SNORDs between M1 and  
565 M2 EVs, which could reflect the different experimental settings; while we used a 10-day long  
566 polarisation protocol followed by a 24h EV generation period for human mo-macrophages, Rimer et al.

567 (2018) collected EVs 1h after stimulation of mouse bone marrow derived macrophages and noticed  
568 clearance of these RNAs from the medium within 4h.

569

570 One limitation of small RNA sequencing (<75 nucleotides), and therefore our study, is the effect of the  
571 cut-off on detectable RNAs. For instance, snoRNAs with sizes ranging between 60 and 170 nucleotides  
572 might not be comprehensively represented in the final dataset. Thus, careful consideration is required  
573 when comparing EV RNA cargo information obtained using different sequencing methodologies.  
574 Analysing bulk EV RNA precludes the appreciation of the heterogeneity in the transcriptome of single  
575 EVs; detection of individual RNAs on a single EV basis, e.g., by flow cytometry, could be employed to  
576 study immune cell EV RNA cargo at a more granular level. To date, both small and total RNA sequencing  
577 have considerably advanced our understanding of the diverse EV RNA cargo (reviewed by Dellar et al.  
578 (2022)).

579

580 In this study, we isolated EVs from M1 -pro-inflammatory- and M2 -anti-inflammatory- primary  
581 macrophages using size exclusion chromatography and performed small RNA sequencing to provide a  
582 comprehensive analysis of their small non-coding RNA cargo. Overall, we propose that the M1/M2 EV  
583 transcriptome is shaped by distinct non-coding RNA structures. Within each subtype of small RNA, we  
584 demonstrate many significant differences between M1 and M2 EVs, likely aided by our long polarisation  
585 protocol and the absence of any serum at any stage of culture, which could affect cell function and  
586 contaminate EV isolates. Functional enrichment analysis of miRNA targets revealed contrasting targets  
587 of EVs from M1 and M2 macrophages, which likely contribute to their functional effects on their  
588 environment. Similarly, differentially sorted tRNA fragments, piRNA, snRNA, snoRNA and Y-RNAs in M1  
589 and M2 EVs might exert functional effects in recipient cells, or their secretion might be important for  
590 the parental cell. A deeper look into the relevance of small RNA fragments transported via EVs is an  
591 important next step.

592



593 **Data availability statement**

594 All the sequencing data generated in this study have been deposited to the Gene Expression Omnibus  
595 (GEO) repository database with the accession number GSE207286. Also, this study is registered on EV-  
596 TRACK with reference number EV220120.

597

598 **Acknowledgements**

599 Research reported in this publication was supported by National Institute for Child Health (NICHD) of  
600 the National Institutes of Health under award number R01HD093801. The content is solely the  
601 responsibility of the authors and does not necessarily represent the official views of the National  
602 Institutes of Health. MV is supported by the EU grant No. 964712 (EU-H2020-FETOpen PRIME).

603

604 **Author contributions**

605 Paschalia Pantazi: experimental work, data curation, writing – original draft. Toby Clements:  
606 experimental work, writing – review & editing. Morten Venø: data analysis, writing – review & editing.  
607 Vikki Abrahams: methodology, writing – review & editing. Beth Holder: funding acquisition, supervision,  
608 methodology, data curation, writing – original draft and review & editing. All authors have read and  
609 approved the final version of the manuscript.

610

611 **Conflict of interest**

612 The authors declare no conflict of interest.

613

614 **References**

615 ALIVERNINI, S., GREMESE, E., MCSHARRY, C., TOLUSSO, B., FERRACCIOLI, G., MCINNES, I. B. &  
616 KUROWSKA-STOLARSKA, M. 2017. MicroRNA-155-at the Critical Interface of Innate and  
617 Adaptive Immunity in Arthritis. *Front Immunol*, 8, 1932.  
618 BAGLIO, S. R., ROOIJERS, K., KOPPERS-LALIC, D., VERWEIJ, F. J., PEREZ LANZON, M., ZINI, N.,  
619 NAAJKENS, B., PERUT, F., NIESSEN, H. W., BALDINI, N. & PEGTEL, D. M. 2015. Human bone

- 620 marrow- and adipose-mesenchymal stem cells secrete exosomes enriched in distinctive  
621 miRNA and tRNA species. *Stem Cell Res Ther*, 6, 127.
- 622 BANERJEE, S., XIE, N., CUI, H., TAN, Z., YANG, S., ICYUZ, M., ABRAHAM, E. & LIU, G. 2013. MicroRNA  
623 let-7c regulates macrophage polarization. *J Immunol*, 190, 6542-9.
- 624 BARANISKIN, A., NOPEL-DUNNEBACKE, S., AHRENS, M., JENSEN, S. G., ZOLLNER, H., MAGHNOUJ, A.,  
625 WOS, A., MAYERLE, J., MUNDING, J., KOST, D., REINACHER-SCHICK, A., LIFFERS, S., SCHROERS,  
626 R., CHROMIK, A. M., MEYER, H. E., UHL, W., KLEIN-SCORY, S., WEISS, F. U., STEPHAN, C.,  
627 SCHWARTE-WALDHOFF, I., LERCH, M. M., TANNAPFEL, A., SCHMIEGEL, W., ANDERSEN, C. L. &  
628 HAHN, S. A. 2013. Circulating U2 small nuclear RNA fragments as a novel diagnostic biomarker  
629 for pancreatic and colorectal adenocarcinoma. *Int J Cancer*, 132, E48-57.
- 630 BARANISKIN, A., ZASLAVSKA, E., NOPEL-DUNNEBACKE, S., AHLE, G., SEIDEL, S., SCHLEGEL, U.,  
631 SCHMIEGEL, W., HAHN, S. & SCHROERS, R. 2016. Circulating U2 small nuclear RNA fragments  
632 as a novel diagnostic biomarker for primary central nervous system lymphoma. *Neuro Oncol*,  
633 18, 361-7.
- 634 BASAVARAJAPPA, D., UEBBING, S., KREISS, M., LUKIC, A., SUESS, B., STEINHILBER, D., SAMUELSSON, B.  
635 & RADMARK, O. 2020. Dicer up-regulation by inhibition of specific proteolysis in  
636 differentiating monocytic cells. *Proc Natl Acad Sci U S A*, 117, 8573-8583.
- 637 BERTANI, F. R., MOZETIC, P., FIORAMONTI, M., IULIANI, M., RIBELLI, G., PANTANO, F., SANTINI, D.,  
638 TONINI, G., TROMBETTA, M., BUSINARO, L., SELCI, S. & RAINER, A. 2017. Classification of  
639 M1/M2-polarized human macrophages by label-free hyperspectral reflectance confocal  
640 microscopy and multivariate analysis. *Sci Rep*, 7, 8965.
- 641 BHATNAGAR, S. & SCHOREY, J. S. 2007. Exosomes released from infected macrophages contain  
642 Mycobacterium avium glycopeptidolipids and are proinflammatory. *J Biol Chem*, 282, 25779-  
643 89.
- 644 BOUCHAREYCHAS, L., DUONG, P., COVARRUBIAS, S., ALSOP, E., PHU, T. A., CHUNG, A., GOMES, M.,  
645 WONG, D., MEECHOOVET, B., CAPILI, A., YAMAMOTO, R., NAKAUCHI, H., MCMANUS, M. T.,  
646 CARPENTER, S., VAN KEUREN-JENSEN, K. & RAFFAI, R. L. 2020. Macrophage Exosomes Resolve  
647 Atherosclerosis by Regulating Hematopoiesis and Inflammation via MicroRNA Cargo. *Cell Rep*,  
648 32, 107881.
- 649 CHIOU, N. T., KAGEYAMA, R. & ANSEL, K. M. 2018. Selective Export into Extracellular Vesicles and  
650 Function of tRNA Fragments during T Cell Activation. *Cell Rep*, 25, 3356-3370 e4.
- 651 CONSORTIUM, E.-T., VAN DEUN, J., MESTDAGH, P., AGOSTINIS, P., AKAY, O., ANAND, S., ANCKAERT,  
652 J., MARTINEZ, Z. A., BAETENS, T., BEGHEIN, E., BERTIER, L., BERX, G., BOERE, J., BOUKOURIS,  
653 S., BREMER, M., BUSCHMANN, D., BYRD, J. B., CASERT, C., CHENG, L., CMOCH, A., DAVELOOSE,  
654 D., DE SMEDT, E., DEMIRSOY, S., DEPOORTER, V., DHONDT, B., DRIEDONKS, T. A., DUDEK, A.,  
655 ELSHARAWY, A., FLORIS, I., FOERS, A. D., GARTNER, K., GARG, A. D., GEEURICKX, E.,  
656 GETTEMANS, J., GHAZAVI, F., GIEBEL, B., KORMELINK, T. G., HANCOCK, G., HELSMOORTELE, H.,  
657 HILL, A. F., HYENNE, V., KALRA, H., KIM, D., KOWAL, J., KRAEMER, S., LEIDINGER, P., LEONELLI,  
658 C., LIANG, Y., LIPPENS, L., LIU, S., LO CICERO, A., MARTIN, S., MATHIVANAN, S.,  
659 MATHIYALAGAN, P., MATUSEK, T., MILANI, G., MONGUIO-TORTAJADA, M., MUS, L. M., MUTH,  
660 D. C., NEMETH, A., NOLTE-T HOEN, E. N., O'DRISCOLL, L., PALMULLI, R., PFAFFL, M. W.,  
661 PRIMDAL-BENGTSON, B., ROMANO, E., ROUSSEAU, Q., SAHOO, S., SAMPAIO, N., SAMUEL, M.,  
662 SCICLUNA, B., SOEN, B., STEELS, A., SWINNEN, J. V., TAKATALO, M., THAMINY, S., THERY, C.,  
663 TULKENS, J., VAN AUDENHOVE, I., VAN DER GREIN, S., VAN GOETHEM, A., VAN HERWIJNEN,  
664 M. J., VAN NIEL, G., VAN ROY, N., VAN VLIET, A. R., VANDAMME, N., VANHAUWAERT, S.,  
665 VERGAUWEN, G., VERWEIJ, F., WALLAERT, A., WAUBEN, M., WITWER, K. W., ZONNEVELD, M.  
666 I., DE WEVER, O., VANDESOMPELE, J. & HENDRIX, A. 2017. EV-TRACK: transparent reporting  
667 and centralizing knowledge in extracellular vesicle research. *Nat Methods*, 14, 228-232.
- 668 COOKE, W. R., CRIBBS, A., ZHANG, W., KANDZIJA, N., MOTTA-MEJIA, C., DOMBI, E., RI, R., CERDEIRA,  
669 A. S., REDMAN, C. & VATISH, M. 2019. Maternal circulating syncytiotrophoblast-derived

- 670 extracellular vesicles contain biologically active 5'-tRNA halves. *Biochem Biophys Res*  
671 *Commun*, 518, 107-113.
- 672 CURTALE, G., RENZI, T. A., MIROLO, M., DRUFUCA, L., ALBANESE, M., DE LUCA, M., ROSSATO, M.,  
673 BAZZONI, F. & LOCATI, M. 2018. Multi-Step Regulation of the TLR4 Pathway by the miR-  
674 125a~99b~let-7e Cluster. *Front Immunol*, 9, 2037.
- 675 CURTALE, G., RUBINO, M. & LOCATI, M. 2019. MicroRNAs as Molecular Switches in Macrophage  
676 Activation. *Front Immunol*, 10, 799.
- 677 CYPRYK, W., LOREY, M., PUUSTINEN, A., NYMAN, T. A. & MATIKAINEN, S. 2017. Proteomic and  
678 Bioinformatic Characterization of Extracellular Vesicles Released from Human Macrophages  
679 upon Influenza A Virus Infection. *J Proteome Res*, 16, 217-227.
- 680 CYPRYK, W., OHMAN, T., ESKELINEN, E. L., MATIKAINEN, S. & NYMAN, T. A. 2014. Quantitative  
681 proteomics of extracellular vesicles released from human monocyte-derived macrophages  
682 upon beta-glucan stimulation. *J Proteome Res*, 13, 2468-77.
- 683 DARZACQ, X., JADY, B. E., VERHEGGEN, C., KISS, A. M., BERTRAND, E. & KISS, T. 2002. Cajal body-  
684 specific small nuclear RNAs: a novel class of 2'-O-methylation and pseudouridylation guide  
685 RNAs. *EMBO J*, 21, 2746-56.
- 686 DEGUINE, J. & BARTON, G. M. 2014. MyD88: a central player in innate immune signaling. *F1000Prime*  
687 *Rep*, 6, 97.
- 688 DELLAR, R. E., HILL, C., MELLING, E. G., CARTER, R. F. D. & BAENA-LOPEZ, L. A. 2022. Unpacking  
689 extracellular vesicles: RNA cargo loading and function. *J of Extracellular Bio*, 1, e40.
- 690 DENG, J., PTASHKIN, R. N., CHEN, Y., CHENG, Z., LIU, G., PHAN, T., DENG, X., ZHOU, J., LEE, I., LEE, Y. S.  
691 & BAO, X. 2015. Respiratory Syncytial Virus Utilizes a tRNA Fragment to Suppress Antiviral  
692 Responses Through a Novel Targeting Mechanism. *Mol Ther*, 23, 1622-9.
- 693 DHAHBI, J. M., SPINDLER, S. R., ATAMNA, H., BOFFELLI, D. & MARTIN, D. I. 2014. Deep Sequencing of  
694 Serum Small RNAs Identifies Patterns of 5' tRNA Half and YRNA Fragment Expression  
695 Associated with Breast Cancer. *Biomark Cancer*, 6, 37-47.
- 696 DONG, C., DAVIS, R. J. & FLAVELL, R. A. 2002. MAP kinases in the immune response. *Annu Rev Immunol*,  
697 20, 55-72.
- 698 DRIEDONKS, T. A. P., VAN DER GREIN, S. G., ARIYUREK, Y., BUERMANS, H. P. J., JEKEL, H., CHOW, F. W.  
699 N., WAUBEN, M. H. M., BUCK, A. H., T HOEN, P. A. C. & NOLTE-'T HOEN, E. N. M. 2018. Immune  
700 stimuli shape the small non-coding transcriptome of extracellular vesicles released by  
701 dendritic cells. *Cell Mol Life Sci*, 75, 3857-3875.
- 702 EMARA, M. M., IVANOV, P., HICKMAN, T., DAWRA, N., TISDALE, S., KEDERSHA, N., HU, G. F. &  
703 ANDERSON, P. 2010. Angiogenin-induced tRNA-derived stress-induced RNAs promote stress-  
704 induced stress granule assembly. *J Biol Chem*, 285, 10959-68.
- 705 FISHILEVICH, S., NUDEL, R., RAPPAPORT, N., HADAR, R., PLASCHKES, I., INY STEIN, T., ROSEN, N., KOHN,  
706 A., TWIK, M., SAFRAN, M., LANCET, D. & COHEN, D. 2017. GeneHancer: genome-wide  
707 integration of enhancers and target genes in GeneCards. *Database (Oxford)*, 2017.
- 708 GOODARZI, H., LIU, X., NGUYEN, H. C., ZHANG, S., FISH, L. & TAVAZOIE, S. F. 2015. Endogenous tRNA-  
709 Derived Fragments Suppress Breast Cancer Progression via YBX1 Displacement. *Cell*, 161, 790-  
710 802.
- 711 HADERK, F., SCHULZ, R., ISKAR, M., CID, L. L., WORST, T., WILLMUND, K. V., SCHULZ, A., WARNKEN, U.,  
712 SEILER, J., BENNER, A., NESSLING, M., ZENZ, T., GOBEL, M., DURIG, J., DIEDERICH, S.,  
713 PAGGETTI, J., MOUSSAY, E., STILGENBAUER, S., ZAPATKA, M., LICHTER, P. & SEIFFERT, M.  
714 2017. Tumor-derived exosomes modulate PD-L1 expression in monocytes. *Sci Immunol*, 2.
- 715 HAMMOND, S. M. 2015. An overview of microRNAs. *Adv Drug Deliv Rev*, 87, 3-14.
- 716 HEMMING, B. A. & RESTUCCIA, D. F. 2015. The PI3K-PKB/Akt pathway. *Cold Spring Harb Perspect Biol*,  
717 7.
- 718 HU, G. & CHRISTMAN, J. W. 2019. Editorial: Alveolar Macrophages in Lung Inflammation and  
719 Resolution. *Front Immunol*, 10, 2275.

- 720 ITALIANI, P., MAZZA, E. M., LUCCHESI, D., CIFOLA, I., GEMELLI, C., GRANDE, A., BATTAGLIA, C.,  
721 BICCIATO, S. & BORASCHI, D. 2014. Transcriptomic profiling of the development of the  
722 inflammatory response in human monocytes in vitro. *PLoS One*, 9, e87680.
- 723 JACOB, F. & MONOD, J. 1961. Genetic regulatory mechanisms in the synthesis of proteins. *J Mol Biol*,  
724 3, 318-56.
- 725 JOILIN, G., GRAY, E., THOMPSON, A. G., BOBEVA, Y., TALBOT, K., WEISHAUP, J., LUDOLPH, A.,  
726 MALASPINA, A., LEIGH, P. N., NEWBURY, S. F., TURNER, M. R. & HAFEZPARAST, M. 2020.  
727 Identification of a potential non-coding RNA biomarker signature for amyotrophic lateral  
728 sclerosis. *Brain Commun*, 2, fcaa053.
- 729 KHALIFE, J., GHOSE, J., MARTELLA, M., VIOLA, D., ROCCI, A., TROADEC, E., TERRAZAS, C., SATOSKAR, A.  
730 R., GUNES, E. G., DONA, A., SANCHEZ, J. F., BERGSAGEL, P. L., CHESI, M., POZHITKOV, A.,  
731 ROSEN, S., MARCUCCI, G., KEATS, J. J., HOFMEISTER, C. C., KRISHNAN, A., CASERTA, E. &  
732 PICHIORRI, F. 2019. MiR-16 regulates crosstalk in NF-kappaB tolerogenic inflammatory  
733 signaling between myeloma cells and bone marrow macrophages. *JCI Insight*, 4.
- 734 KOWALSKI, M. P. & KRUDE, T. 2015. Functional roles of non-coding Y RNAs. *Int J Biochem Cell Biol*, 66,  
735 20-9.
- 736 KUHLMANN, J. D., BARANISKIN, A., HAHN, S. A., MOSEL, F., BREDEMEIER, M., WIMBERGER, P.,  
737 KIMMIG, R. & KASIMIR-BAUER, S. 2014. Circulating U2 small nuclear RNA fragments as a novel  
738 diagnostic tool for patients with epithelial ovarian cancer. *Clin Chem*, 60, 206-13.
- 739 KUHLMANN, J. D., WIMBERGER, P., WILSCH, K., FLUCK, M., SUTER, L. & BRUNNER, G. 2015. Increased  
740 level of circulating U2 small nuclear RNA fragments indicates metastasis in melanoma  
741 patients. *Clin Chem Lab Med*, 53, 605-11.
- 742 KUMAR, P., KUSCU, C. & DUTTA, A. 2016. Biogenesis and Function of Transfer RNA-Related Fragments  
743 (tRFs). *Trends Biochem Sci*, 41, 679-689.
- 744 LAFONTAINE, D. L. & TOLLERVEY, D. 1998. Birth of the snoRNPs: the evolution of the modification-  
745 guide snoRNAs. *Trends Biochem Sci*, 23, 383-8.
- 746 LI, Q., HU, B., HU, G. W., CHEN, C. Y., NIU, X., LIU, J., ZHOU, S. M., ZHANG, C. Q., WANG, Y. & DENG, Z.  
747 F. 2016. tRNA-Derived Small Non-Coding RNAs in Response to Ischemia Inhibit Angiogenesis.  
748 *Sci Rep*, 6, 20850.
- 749 LICURSI, V., CONTE, F., FISCON, G. & PACI, P. 2019. MIENTURNET: an interactive web tool for  
750 microRNA-target enrichment and network-based analysis. *BMC Bioinformatics*, 20, 545.
- 751 LIPPS, C., NORTHE, P., FIGUEIREDO, R., ROHDE, M., BRAHMER, A., KRAMER-ALBERS, E. M., LIEBETRAU,  
752 C., WIEDENROTH, C. B., MAYER, E., KRIECHBAUM, S. D., DORR, O., NEF, H., HAMM, C. W.,  
753 KELLER, T. & TROIDL, C. 2019. Non-Invasive Approach for Evaluation of Pulmonary  
754 Hypertension Using Extracellular Vesicle-Associated Small Non-Coding RNA. *Biomolecules*, 9.
- 755 LIU, D. S. K., YANG, Q. Z. C., ASIM, M., KRELL, J. & FRAMPTON, A. E. 2022. The Clinical Significance of  
756 Transfer RNAs Present in Extracellular Vesicles. *Int J Mol Sci*, 23.
- 757 LOBB, R. J., BECKER, M., WEN, S. W., WONG, C. S., WIEGMANS, A. P., LEIMGRUBER, A. & MOLLER, A.  
758 2015. Optimized exosome isolation protocol for cell culture supernatant and human plasma.  
759 *J Extracell Vesicles*, 4, 27031.
- 760 LOHER, P., TELONIS, A. G. & RIGOUTSOS, I. 2017. MINTmap: fast and exhaustive profiling of nuclear  
761 and mitochondrial tRNA fragments from short RNA-seq data. *Sci Rep*, 7, 41184.
- 762 LUNAVAT, T. R., CHENG, L., KIM, D. K., BHADURY, J., JANG, S. C., LASSER, C., SHARPLES, R. A., LOPEZ,  
763 M. D., NILSSON, J., GHO, Y. S., HILL, A. F. & LOTVALL, J. 2015. Small RNA deep sequencing  
764 discriminates subsets of extracellular vesicles released by melanoma cells--Evidence of unique  
765 microRNA cargos. *RNA Biol*, 12, 810-23.
- 766 LUTEIJN, M. J. & KETTING, R. F. 2013. PIWI-interacting RNAs: from generation to transgenerational  
767 epigenetics. *Nat Rev Genet*, 14, 523-34.
- 768 MAIESE, K. 2020. The Mechanistic Target of Rapamycin (mTOR): Novel Considerations as an Antiviral  
769 Treatment. *Curr Neurovasc Res*, 17, 332-337.

- 770 MARTINEZ, F. O., GORDON, S., LOCATI, M. & MANTOVANI, A. 2006. Transcriptional profiling of the  
771 human monocyte-to-macrophage differentiation and polarization: new molecules and  
772 patterns of gene expression. *J Immunol*, 177, 7303-11.
- 773 MATSUZAKI, H., DAITOKU, H., HATTA, M., TANAKA, K. & FUKAMIZU, A. 2003. Insulin-induced  
774 phosphorylation of FKHR (Foxo1) targets to proteasomal degradation. *Proc Natl Acad Sci U S*  
775 *A*, 100, 11285-90.
- 776 MONDAL, T., SUBHASH, S., VAID, R., ENROTH, S., UDAY, S., REINIUS, B., MITRA, S., MOHAMMED, A.,  
777 JAMES, A. R., HOBERG, E., MOUSTAKAS, A., GYLLENSTEN, U., JONES, S. J., GUSTAFSSON, C. M.,  
778 SIMS, A. H., WESTERLUND, F., GORAB, E. & KANDURI, C. 2015. MEG3 long noncoding RNA  
779 regulates the TGF-beta pathway genes through formation of RNA-DNA triplex structures. *Nat*  
780 *Commun*, 6, 7743.
- 781 MURRAY, P. J., ALLEN, J. E., BISWAS, S. K., FISHER, E. A., GILROY, D. W., GOERDT, S., GORDON, S.,  
782 HAMILTON, J. A., IVASHKIV, L. B., LAWRENCE, T., LOCATI, M., MANTOVANI, A., MARTINEZ, F.  
783 O., MEGE, J. L., MOSSER, D. M., NATOLI, G., SAEIJ, J. P., SCHULTZE, J. L., SHIREY, K. A., SICA, A.,  
784 SUTTLES, J., UDALOVA, I., VAN GINDERACHTER, J. A., VOGEL, S. N. & WYNN, T. A. 2014.  
785 Macrophage activation and polarization: nomenclature and experimental guidelines.  
786 *Immunity*, 41, 14-20.
- 787 NOLTE-HOEN, E. N., BUERMANS, H. P., WAASDORP, M., STOOORVOGEL, W., WAUBEN, M. H. & T  
788 HOEN, P. A. 2012. Deep sequencing of RNA from immune cell-derived vesicles uncovers the  
789 selective incorporation of small non-coding RNA biotypes with potential regulatory functions.  
790 *Nucleic Acids Res*, 40, 9272-85.
- 791 O'BRIEN, K., BREYNE, K., UGHETTO, S., LAURENT, L. C. & BREAKFIELD, X. O. 2020. RNA delivery by  
792 extracellular vesicles in mammalian cells and its applications. *Nat Rev Mol Cell Biol*, 21, 585-  
793 606.
- 794 PARISI, L., GINI, E., BACI, D., TREMOLATI, M., FANULI, M., BASSANI, B., FARRONATO, G., BRUNO, A. &  
795 MORTARA, L. 2018. Macrophage Polarization in Chronic Inflammatory Diseases: Killers or  
796 Builders? *J Immunol Res*, 2018, 8917804.
- 797 PELLO, O. M., DE PIZZOL, M., MIROLO, M., SOUCEK, L., ZAMMATARO, L., AMABILE, A., DONI, A.,  
798 NEBULONI, M., SWIGART, L. B., EVAN, G. I., MANTOVANI, A. & LOCATI, M. 2012. Role of c-MYC  
799 in alternative activation of human macrophages and tumor-associated macrophage biology.  
800 *Blood*, 119, 411-21.
- 801 PLIATSIKA, V., LOHER, P., MAGEE, R., TELONIS, A. G., LONDIN, E., SHIGEMATSU, M., KIRINO, Y. &  
802 RIGOUTSOS, I. 2018. MINTbase v2.0: a comprehensive database for tRNA-derived fragments  
803 that includes nuclear and mitochondrial fragments from all The Cancer Genome Atlas projects.  
804 *Nucleic Acids Res*, 46, D152-D159.
- 805 REINER, N. E. 2009. Methods in molecular biology. Macrophages and dendritic cells. Methods and  
806 protocols. Preface. *Methods Mol Biol*, 531, v-vi.
- 807 REYES, L. & GOLOS, T. G. 2018. Hofbauer Cells: Their Role in Healthy and Complicated Pregnancy. *Front*  
808 *Immunol*, 9, 2628.
- 809 RIMER, J. M., LEE, J., HOLLEY, C. L., CROWDER, R. J., CHEN, D. L., HANSON, P. I., ORY, D. S. & SCHAFFER,  
810 J. E. 2018. Long-range function of secreted small nucleolar RNAs that direct 2'-O-methylation.  
811 *J Biol Chem*, 293, 13284-13296.
- 812 ROSSATO, M., CURTALE, G., TAMASSIA, N., CASTELLUCCI, M., MORI, L., GASPERINI, S., MARIOTTI, B.,  
813 DE LUCA, M., MIROLO, M., CASSATELLA, M. A., LOCATI, M. & BAZZONI, F. 2012. IL-10-induced  
814 microRNA-187 negatively regulates TNF-alpha, IL-6, and IL-12p40 production in TLR4-  
815 stimulated monocytes. *Proc Natl Acad Sci U S A*, 109, E3101-10.
- 816 ROTH, W. W., HUANG, M. B., ADDAE KONADU, K., POWELL, M. D. & BOND, V. C. 2015. Micro RNA in  
817 Exosomes from HIV-Infected Macrophages. *Int J Environ Res Public Health*, 13,  
818 ijerph13010032.
- 819 ROUSH, S. & SLACK, F. J. 2008. The let-7 family of microRNAs. *Trends Cell Biol*, 18, 505-16.

- 820 SAHA, B., KODYS, K., ADEJUMO, A. & SZABO, G. 2017. Circulating and Exosome-Packaged Hepatitis C  
821 Single-Stranded RNA Induce Monocyte Differentiation via TLR7/8 to Polarized Macrophages  
822 and Fibrocytes. *J Immunol*, 198, 1974-1984.
- 823 SCHIMMEL, P. 2018. The emerging complexity of the tRNA world: mammalian tRNAs beyond protein  
824 synthesis. *Nat Rev Mol Cell Biol*, 19, 45-58.
- 825 SHAN, S., WANG, Y. & ZHU, C. 2021. A comprehensive expression profile of tRNA-derived fragments  
826 in papillary thyroid cancer. *J Clin Lab Anal*, 35, e23664.
- 827 SHEN, Y., YU, X., ZHU, L., LI, T., YAN, Z. & GUO, J. 2018. Transfer RNA-derived fragments and tRNA  
828 halves: biogenesis, biological functions and their roles in diseases. *J Mol Med (Berl)*, 96, 1167-  
829 1176.
- 830 SINGH, P. P., LEMAIRE, C., TAN, J. C., ZENG, E. & SCHOREY, J. S. 2011. Exosomes released from M.  
831 tuberculosis infected cells can suppress IFN-gamma mediated activation of naive  
832 macrophages. *PLoS One*, 6, e18564.
- 833 SINGH, P. P., LI, L. & SCHOREY, J. S. 2015. Exosomal RNA from Mycobacterium tuberculosis-Infected  
834 Cells Is Functional in Recipient Macrophages. *Traffic*, 16, 555-71.
- 835 SORK, H., CORSO, G., KRJUTSKOV, K., JOHANSSON, H. J., NORDIN, J. Z., WIKLANDER, O. P. B., LEE, Y. X.  
836 F., WESTHOLM, J. O., LEHTIO, J., WOOD, M. J. A., MAGER, I. & EL ANDALOUSSI, S. 2018.  
837 Heterogeneity and interplay of the extracellular vesicle small RNA transcriptome and  
838 proteome. *Sci Rep*, 8, 10813.
- 839 SRINIVASAN, S., YERI, A., CHEAH, P. S., CHUNG, A., DANIELSON, K., DE HOFF, P., FILANT, J., LAURENT,  
840 C. D., LAURENT, L. D., MAGEE, R., MOELLER, C., MURTHY, V. L., NEJAD, P., PAUL, A.,  
841 RIGOUTSOS, I., RODOSTHENOUS, R., SHAH, R. V., SIMONSON, B., TO, C., WONG, D., YAN, I. K.,  
842 ZHANG, X., BALAJ, L., BREAKEFIELD, X. O., DAABOUL, G., GANDHI, R., LAPIDUS, J., LONDIN, E.,  
843 PATEL, T., RAFFAI, R. L., SOOD, A. K., ALEXANDER, R. P., DAS, S. & LAURENT, L. C. 2019. Small  
844 RNA Sequencing across Diverse Biofluids Identifies Optimal Methods for exRNA Isolation. *Cell*,  
845 177, 446-462 e16.
- 846 THERY, C., WITWER, K. W., AIKAWA, E., ALCARAZ, M. J., ANDERSON, J. D., ANDRIANTSITOHAINA, R.,  
847 ANTONIOU, A., ARAB, T., ARCHER, F., ATKIN-SMITH, G. K., AYRE, D. C., BACH, J. M., BACHURSKI,  
848 D., BAHARVAND, H., BALAJ, L., BALDACCHINO, S., BAUER, N. N., BAXTER, A. A., BEBAWY, M.,  
849 BECKHAM, C., BEDINA ZAVEC, A., BENMOUSSA, A., BERARDI, A. C., BERGESE, P., BIELSKA, E.,  
850 BLENKIRON, C., BOBIS-WOZOWICZ, S., BOILARD, E., BOIREAU, W., BONGIOVANNI, A., BORRAS,  
851 F. E., BOSCH, S., BOULANGER, C. M., BREAKEFIELD, X., BREGGIO, A. M., BRENNAN, M. A.,  
852 BRIGSTOCK, D. R., BRISSON, A., BROEKMAN, M. L., BROMBERG, J. F., BRYL-GORECKA, P., BUCH,  
853 S., BUCK, A. H., BURGER, D., BUSATTO, S., BUSCHMANN, D., BUSSOLATI, B., BUZAS, E. I., BYRD,  
854 J. B., CAMUSSI, G., CARTER, D. R., CARUSO, S., CHAMLEY, L. W., CHANG, Y. T., CHEN, C., CHEN,  
855 S., CHENG, L., CHIN, A. R., CLAYTON, A., CLERICI, S. P., COCKS, A., COCUCCI, E., COFFEY, R. J.,  
856 CORDEIRO-DA-SILVA, A., COUCH, Y., COUMANS, F. A., COYLE, B., CRESCITELLI, R., CRIADO, M.  
857 F., D'SOUZA-SCHOREY, C., DAS, S., DATTA CHAUDHURI, A., DE CANDIA, P., DE SANTANA, E. F.,  
858 DE WEVER, O., DEL PORTILLO, H. A., DEMARET, T., DEVILLE, S., DEVITT, A., DHONDT, B., DI  
859 VIZIO, D., DIETERICH, L. C., DOLO, V., DOMINGUEZ RUBIO, A. P., DOMINICI, M., DOURADO, M.  
860 R., DRIEDONKS, T. A., DUARTE, F. V., DUNCAN, H. M., EICHENBERGER, R. M., EKSTROM, K., EL  
861 ANDALOUSSI, S., ELIE-CAILLE, C., ERDBRUGGER, U., FALCON-PEREZ, J. M., FATIMA, F., FISH, J.  
862 E., FLORES-BELLVER, M., FORSONITS, A., FRELET-BARRAND, A., et al. 2018. Minimal  
863 information for studies of extracellular vesicles 2018 (MISEV2018): a position statement of  
864 the International Society for Extracellular Vesicles and update of the MISEV2014 guidelines. *J*  
865 *Extracell Vesicles*, 7, 1535750.
- 866 TOSAR, J. P., GAMBARO, F., SANGUINETTI, J., BONILLA, B., WITWER, K. W. & CAYOTA, A. 2015.  
867 Assessment of small RNA sorting into different extracellular fractions revealed by high-  
868 throughput sequencing of breast cell lines. *Nucleic Acids Res*, 43, 5601-16.
- 869 VEZIROGLU, E. M. & MIAS, G. I. 2020. Characterizing Extracellular Vesicles and Their Diverse RNA  
870 Contents. *Front Genet*, 11, 700.

- 871 VOJTECH, L., WOO, S., HUGHES, S., LEVY, C., BALLWEBER, L., SAUTERAUD, R. P., STROBL, J.,  
872 WESTERBERG, K., GOTTARDO, R., TEWARI, M. & HLADIK, F. 2014. Exosomes in human semen  
873 carry a distinctive repertoire of small non-coding RNAs with potential regulatory functions.  
874 *Nucleic Acids Res*, 42, 7290-304.
- 875 WAN, J., BENKDANE, M., TEIXEIRA-CLERC, F., BONNAFOUS, S., LOUVET, A., LAFDIL, F., PECKER, F.,  
876 TRAN, A., GUAL, P., MALLAT, A., LOTERSZTAJN, S. & PAVOINE, C. 2014. M2 Kupffer cells  
877 promote M1 Kupffer cell apoptosis: a protective mechanism against alcoholic and  
878 nonalcoholic fatty liver disease. *Hepatology*, 59, 130-42.
- 879 WANG, L. P., LIN, J., MA, X. Q., XU, D. Y., SHI, C. F., WANG, W. & JIANG, X. J. 2021. Exosomal DLX6-AS1  
880 from hepatocellular carcinoma cells induces M2 macrophage polarization to promote  
881 migration and invasion in hepatocellular carcinoma through microRNA-15a-5p/CXCL17 axis. *J*  
882 *Exp Clin Cancer Res*, 40, 177.
- 883 WANG, Z., XU, L., HU, Y., HUANG, Y., ZHANG, Y., ZHENG, X., WANG, S., WANG, Y., YU, Y., ZHANG, M.,  
884 YUAN, K. & MIN, W. 2016. miRNA let-7b modulates macrophage polarization and enhances  
885 tumor-associated macrophages to promote angiogenesis and mobility in prostate cancer. *Sci*  
886 *Rep*, 6, 25602.
- 887 WEBBER, J. P., SPARY, L. K., SANDERS, A. J., CHOWDHURY, R., JIANG, W. G., STEADMAN, R., WYMANT,  
888 J., JONES, A. T., KYNASTON, H., MASON, M. D., TABI, Z. & CLAYTON, A. 2015. Differentiation of  
889 tumour-promoting stromal myofibroblasts by cancer exosomes. *Oncogene*, 34, 290-302.
- 890 WEI, Z., BATAGOV, A. O., SCHINELLI, S., WANG, J., WANG, Y., EL FATIMY, R., RABINOVSKY, R., BALAJ,  
891 L., CHEN, C. C., HOCHBERG, F., CARTER, B., BREAKFIELD, X. O. & KRICHEVSKY, A. M. 2017.  
892 Coding and noncoding landscape of extracellular RNA released by human glioma stem cells.  
893 *Nat Commun*, 8, 1145.
- 894 WENG, Q., WANG, Y., XIE, Y., YU, X., ZHANG, S., GE, J., LI, Z., YE, G. & GUO, J. 2022. Extracellular  
895 vesicles-associated tRNA-derived fragments (tRFs): biogenesis, biological functions, and their  
896 role as potential biomarkers in human diseases. *J Mol Med (Berl)*, 100, 679-695.
- 897 XIE, J., ZHANG, M., ZHOU, T., HUA, X., TANG, L. & WU, W. 2007. Sno/scaRNAbase: a curated database  
898 for small nucleolar RNAs and cajal body-specific RNAs. *Nucleic Acids Res*, 35, D183-7.
- 899 XU, W., ZHOU, B., WANG, J., TANG, L., HU, Q., WANG, J., CHEN, H., ZHENG, J., YAN, F. & CHEN, H. 2021.  
900 tRNA-Derived Fragment tRF-Glu-TTC-027 Regulates the Progression of Gastric Carcinoma via  
901 MAPK Signaling Pathway. *Front Oncol*, 11, 733763.
- 902 YANG, Y., GUO, Z., CHEN, W., WANG, X., CAO, M., HAN, X., ZHANG, K., TENG, B., CAO, J., WU, W., CAO,  
903 P., HUANG, C. & QIU, Z. 2021. M2 Macrophage-Derived Exosomes Promote Angiogenesis and  
904 Growth of Pancreatic Ductal Adenocarcinoma by Targeting E2F2. *Mol Ther*, 29, 1226-1238.
- 905 YAO, Z., JIA, X., MEGGER, D. A., CHEN, J., LIU, Y., LI, J., SITEK, B. & YUAN, Z. 2019. Label-Free Proteomic  
906 Analysis of Exosomes Secreted from THP-1-Derived Macrophages Treated with IFN-alpha  
907 Identifies Antiviral Proteins Enriched in Exosomes. *J Proteome Res*, 18, 855-864.
- 908 YERI, A., COURTRIGHT, A., REIMAN, R., CARLSON, E., BEECROFT, T., JANSS, A., SINIARD, A., RICHHOLT,  
909 R., BALAK, C., ROZOWSKY, J., KITCHEN, R., HUTCHINS, E., WINARTA, J., MCCOY, R., ANASTASI,  
910 M., KIM, S., HUENTELMAN, M. & VAN KEUREN-JENSEN, K. 2017. Total Extracellular Small RNA  
911 Profiles from Plasma, Saliva, and Urine of Healthy Subjects. *Sci Rep*, 7, 44061.
- 912 ZHANG, P., WU, W., CHEN, Q. & CHEN, M. 2019. Non-Coding RNAs and their Integrated Networks. *J*  
913 *Integr Bioinform*, 16.
- 914 ZHANG, Y., ZHANG, M., ZHONG, M., SUO, Q. & LV, K. 2013. Expression profiles of miRNAs in polarized  
915 macrophages. *Int J Mol Med*, 31, 797-802.

917 **Figure Legends**

918 **Figure 1. Generation of M1 and M2 monocyte-derived macrophages.** a) Monocytes were isolated from  
919 PBMC by adherence and differentiated using GM-CSF or M-CSF, followed by IFN $\gamma$ +LPS or IL-14+IL-13 to  
920 create M1 and M2 macrophages, respectively. b) Representative images of M1 and M2 macrophages  
921 at 10 days, visualised by light microscopy. c) Gene expression analysis of M1 markers CXCL11 and CCR7  
922 and; d) M2 markers CCL13, MRC1 and CD209 in M1 and M2 macrophages at 10 days measured by  
923 qPCR. RQ; relative quantification. \* P<0.05; Wilcoxon signed rank test; n=6.

924

925 **Figure 2. M1/M2 macrophage-derived extracellular vesicle characterisation.** Extracellular vesicles were  
926 isolated by size exclusion chromatography (SEC) and characterised by nanoparticle tracking analysis  
927 (NTA), electron microscopy, western blotting, and ELISA. a) Representative EV count measured by NTA  
928 (solid blue line; right Y axis) in the first eight SEC fractions overlaid with the protein concentration in 26  
929 SEC fractions (dashed orange line; left Y axis) showing separation of EVs from soluble protein. b)  
930 Representative image of silver staining for the 26 SEC fractions. c) Total particle count measured by  
931 NTA in fractions 1-3, per million PBMC seeded. Wilcoxon matched-pairs signed rank test, p<0.01, n=12.  
932 d) Median size of EVs from M1 and M2 cells, measured by NTA. Wilcoxon matched-pairs signed rank  
933 test, p<0.01, n=12. e) Representative size profile of M1 (red) and M2 (blue) macrophage EVs measured  
934 by NTA. f) Transmission electron micrographs of EVs from M1 and M2 macrophages. g) ELISA for the  
935 canonical EV surface markers CD63 and HLA-A in the first five SEC fractions. h) Western blot for the  
936 luminal EV marker GAPDH and the negative EV marker Calnexin.

937

938 **Figure 3. M1 macrophage EVs have higher relative abundance of miRNA and lower relative abundance**  
939 **of tRNA compared to M2 macrophage EVs.** a) Relative composition of small RNA species miRNA,  
940 isomiRs, tRNA fragments, piRNA, snRNA, snoRNA and yRNA fragments in each sample. b) Comparison  
941 between the M1 and M2 EV RNA species. \*\*p<0.01, M1 and M2 compared by repeated measures two-  
942 way ANOVA with Geisser-Greenhouse correction, followed by Sidak's multiple comparisons test.



943

944 **Figure 4. Distinct miRNA profiles in EVs from M1 and M2 macrophages.** a) The top 10 most abundant  
945 miRNAs in M1 and M2 EVs. RPM; reads per million mapped reads. b) Volcano plot comparing miRNAs  
946 between M1 and M2 EVs. X axis shows the  $\log_2$  fold change and the y axis the  $\log_{10}$  p value. Significantly  
947 different miRNA (false discovery rate (FDR) $<0.05$ ) are coloured red. The twenty miRNAs with the lowest  
948 p value are labelled. c) Principal component analysis of miRNAs, with M1 EVs colour-coded red/pink  
949 and M2 EV samples colour-coded turquoise. d) The relative abundance expressed as reads per million  
950 reads (RPM) of the members of the mir-99b/let-7e/mir-125a cluster in M1 and M2 EVs.

951

952 **Figure 5. Functional enrichment analysis of targets of miRNAs upregulated in EVs from M1 and M2**  
953 **macrophages.** The miRNAs significantly different between M1 EVs (n=43) and M2 EVs (n=29) were input  
954 for MIENTURNET enrichment analysis, based on miRTarBase validated target prediction. a,b) The top  
955 20 gene targets of the miRNA panel significantly upregulated in M1 EVs (a) and M2 EVs (b). Targets  
956 ordered by false discovery rate (FDR), bars indicate the number of miRNA interactions for each target.  
957 c,d) The top 10 miRNAs that were most significantly differentially abundant, and still present following  
958 target enrichment, were then submitted for KEGG pathway analysis. The X axis shows these ten  
959 miRNAs, with the number of gene targets in parentheses. The colours of the dots represent the  
960 adjusted p-values (FDR), and the size of the dots represents the gene ratio (the number of miRNA  
961 targets found annotated in each category divided by the total number of recognised gene targets).

962

963 **Figure 6. tRNA profiles in EVs from M1 and M2 macrophages.** a) tRNA fragments were classified into  
964 five types following MINTbase terminology; tRNA halves from the 3' or 5' region (3'half/5'half  
965 respectively), shorter sequences from the 3' or 5' region (3'tRF/5'tRF respectively), or tRNA fragments  
966 from the internal region (itRFs). b) The number of all tRNA fragments of each subtype present in EVs  
967 from M1 and M2 macrophages. \* $p<0.05$ , repeated measures two-way ANOVA with Geisser-  
968 Greenhouse correction, followed by Sidak's multiple comparisons test. c) Volcano plot comparing

969 tRNA fragments between M1 and M2 EVs. The X axis shows the log<sub>2</sub> fold change and the y axis the  
970 log<sub>10</sub> p value. Significantly different tRNA (false discovery rate (FDR)<0.05) are coloured red. The  
971 twenty tRNA fragments with the lowest p value are labelled.

972

973 **Figure 7. piRNA, snRNA, snoRNA, and yRNA profiles in EVs from M1 and M2 macrophages.** a) Volcano  
974 plot comparing piRNA fragments between M1 and M2 EVs. b) Volcano plot comparing snRNA fragments  
975 between M1 and M2 EVs. c) Volcano plot comparing snoRNA fragments between M1 and M2 EVs. d)  
976 Volcano plot comparing yRNA fragments between M1 and M2 EVs. For all volcano plots, the X axis  
977 shows the log<sub>2</sub> fold change and the y axis the log<sub>10</sub> p value. Significantly different tRNA (false discovery  
978 rate (FDR)<0.05) are coloured red. The twenty RNAs with the lowest p value are labelled.

979

980 Figures

981 Figure 1.

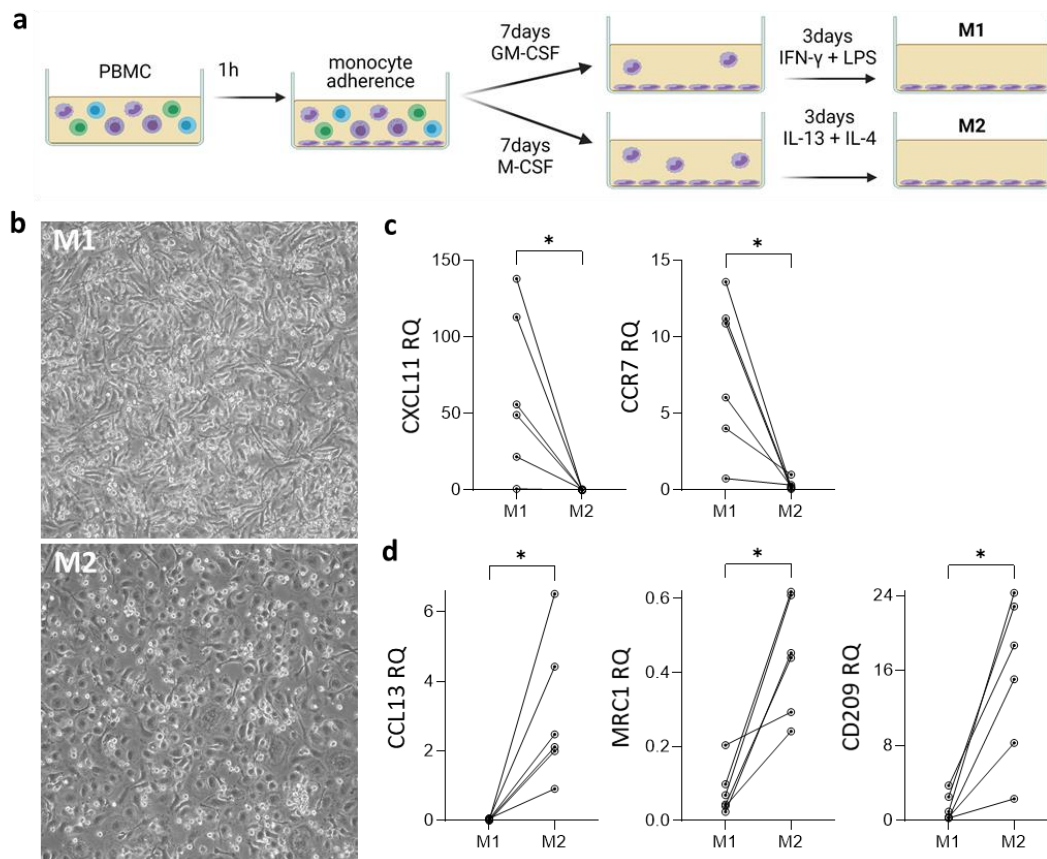

982

983 Figure 2.

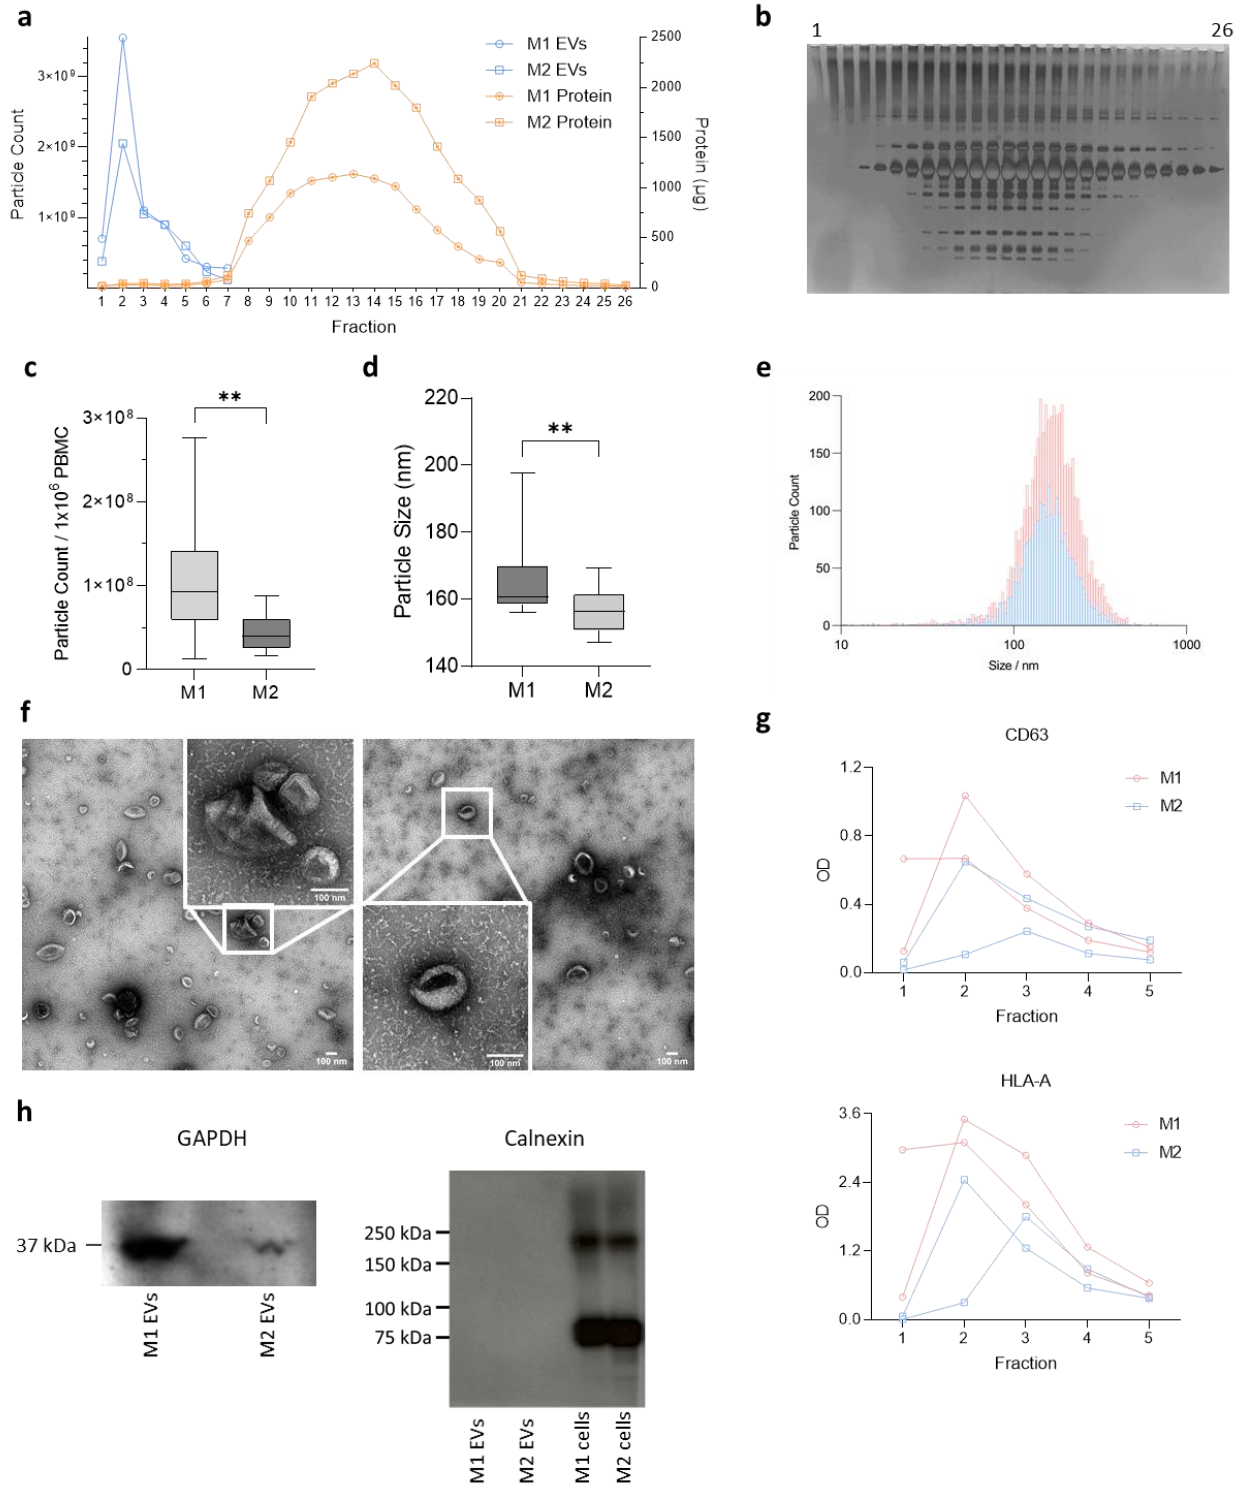

985 Figure 3.

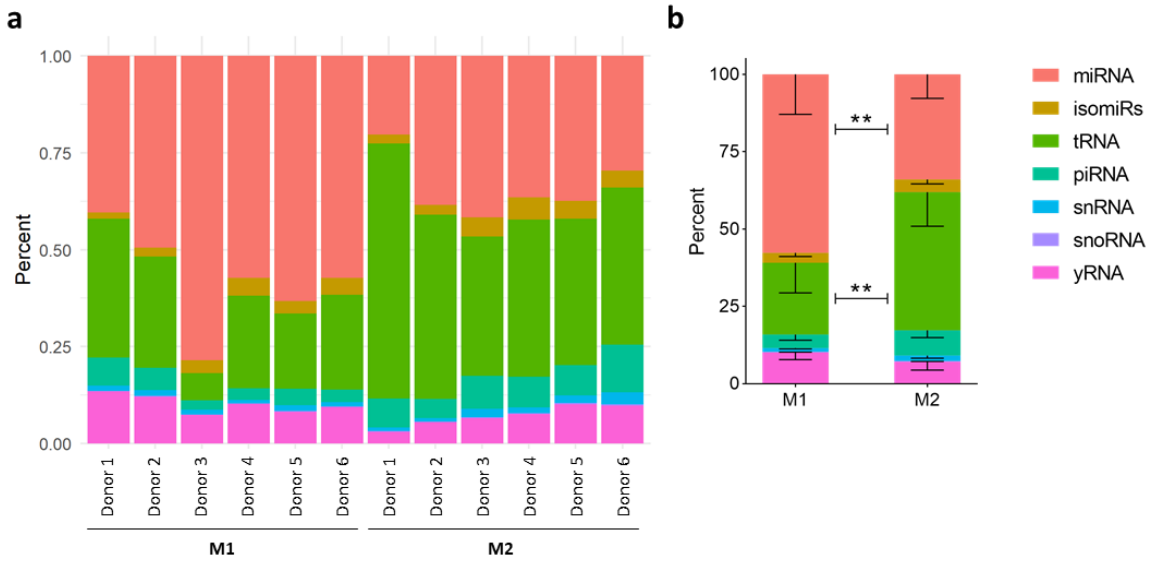

986

987 Figure 4.

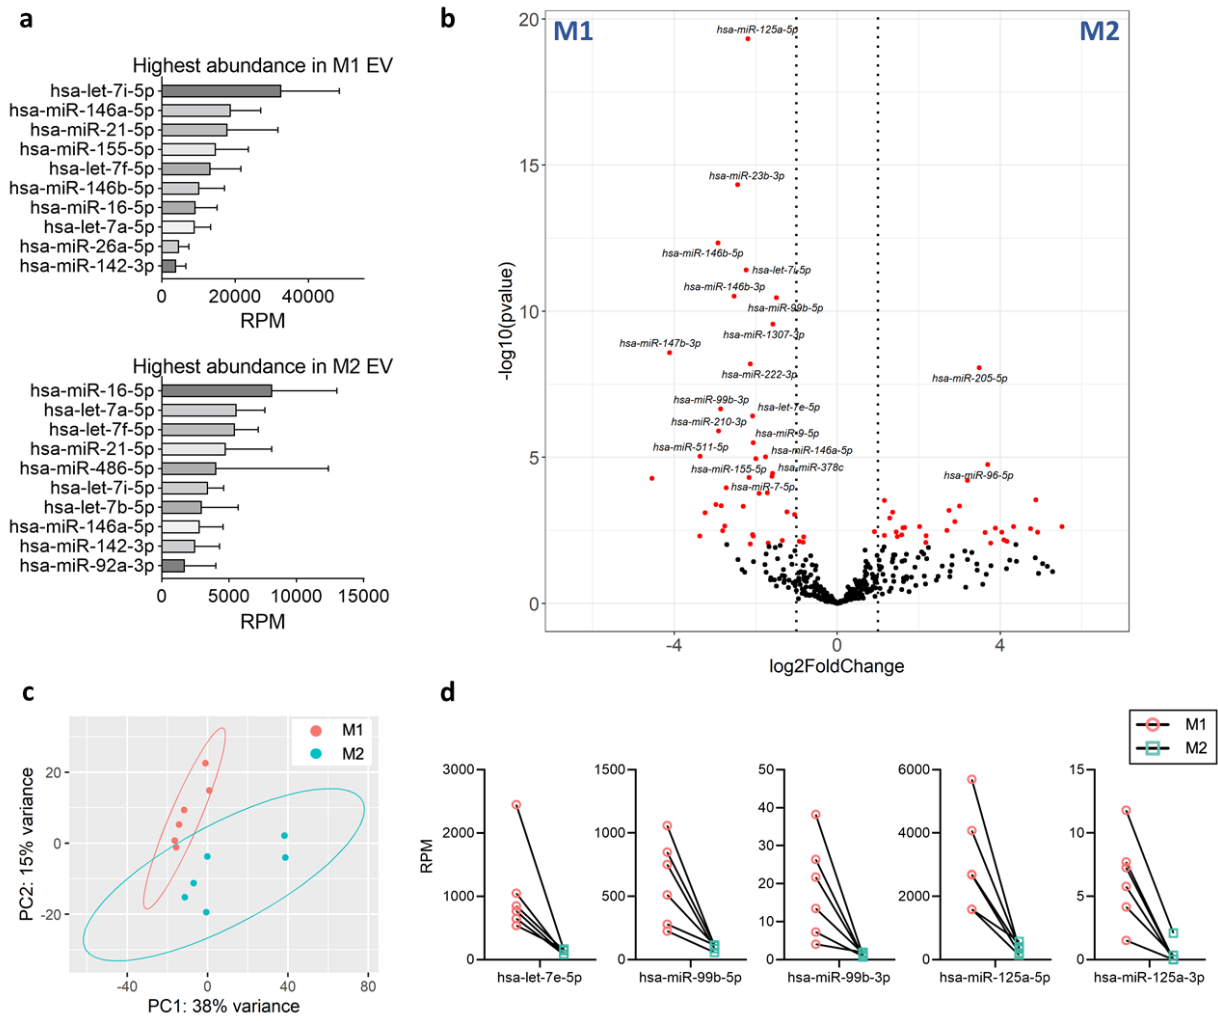

988

989 Figure 5.

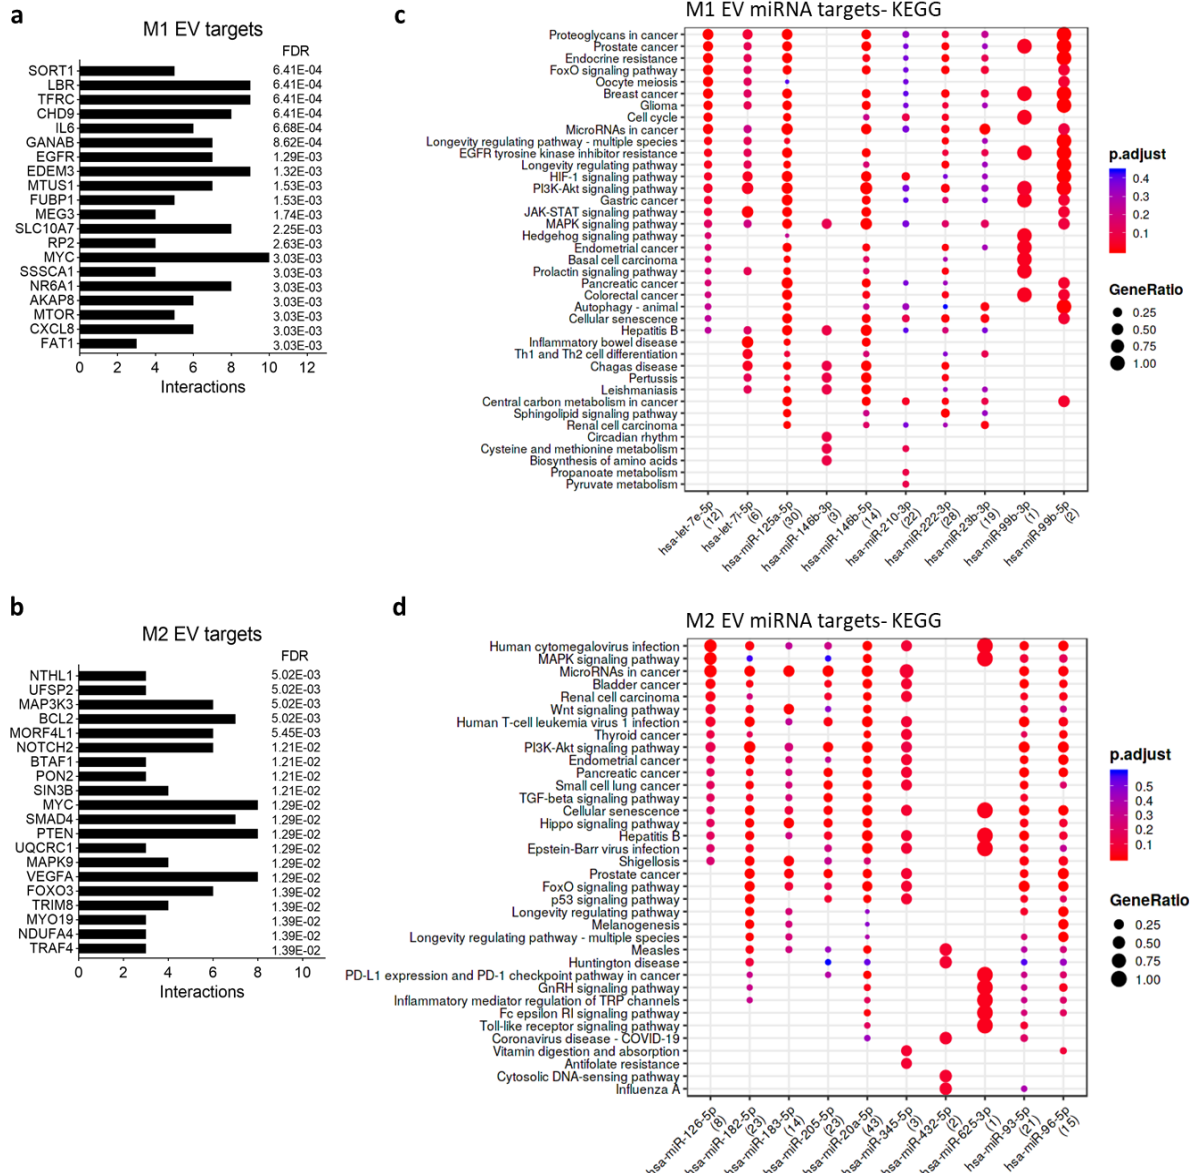

991 Figure 6.

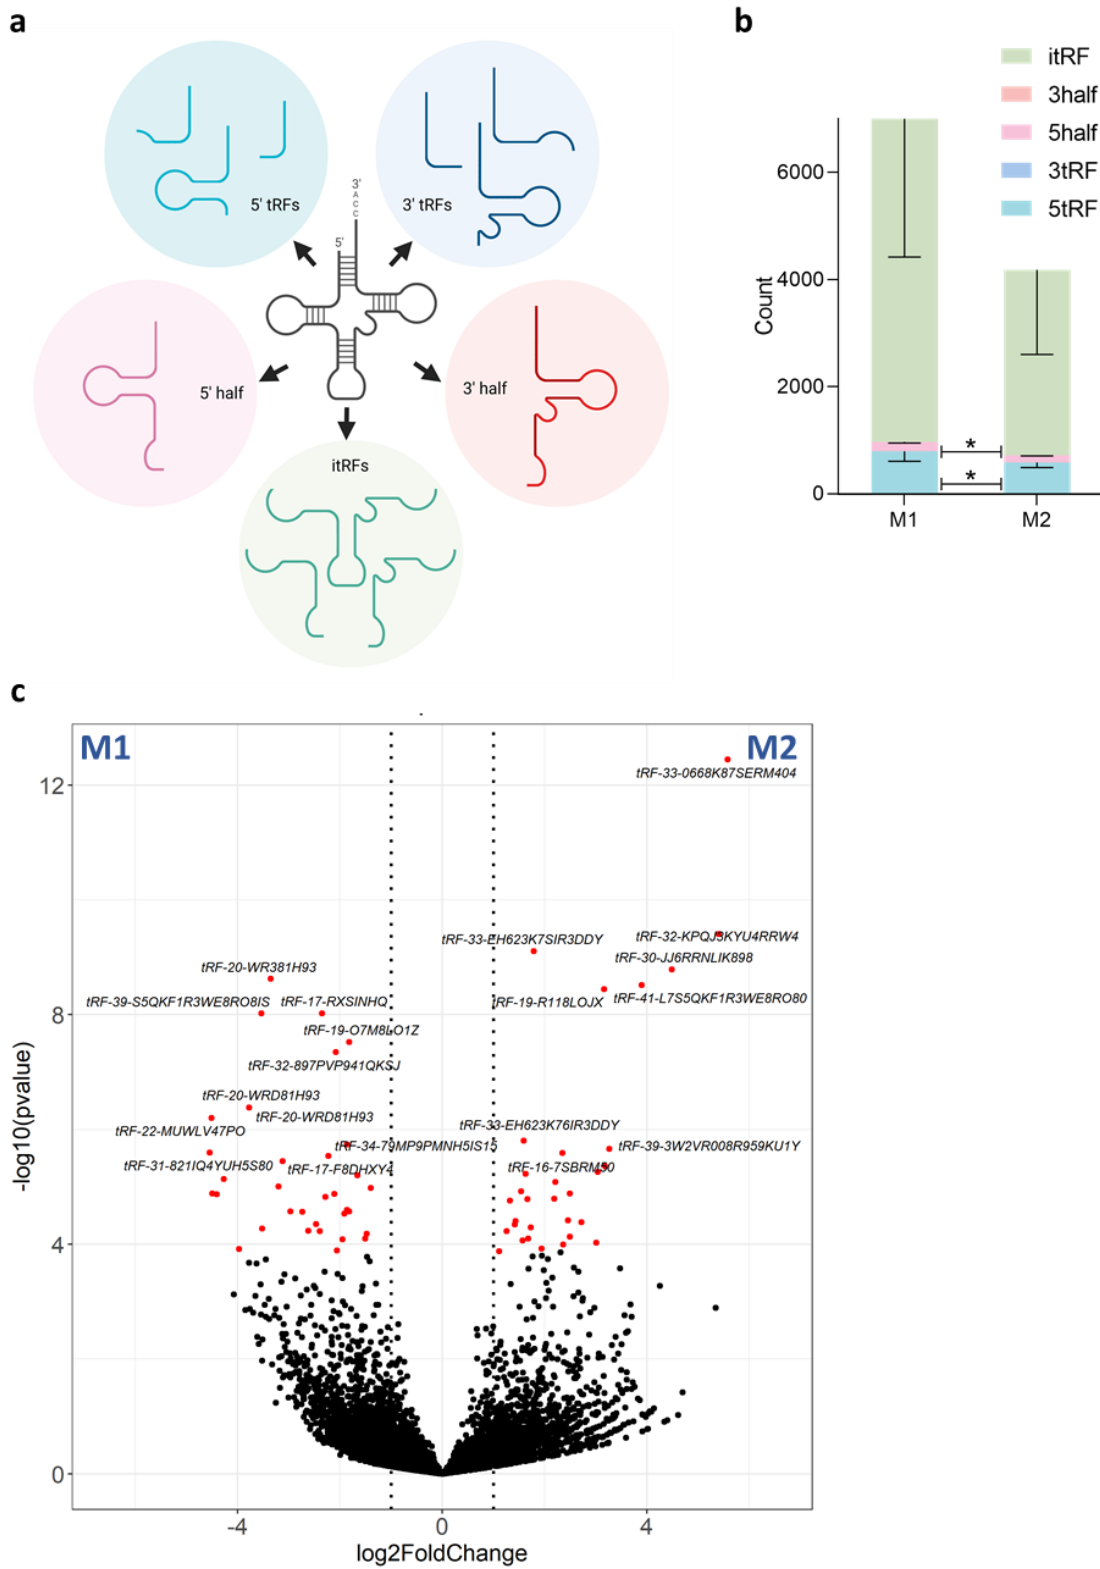



993 Figure 7.

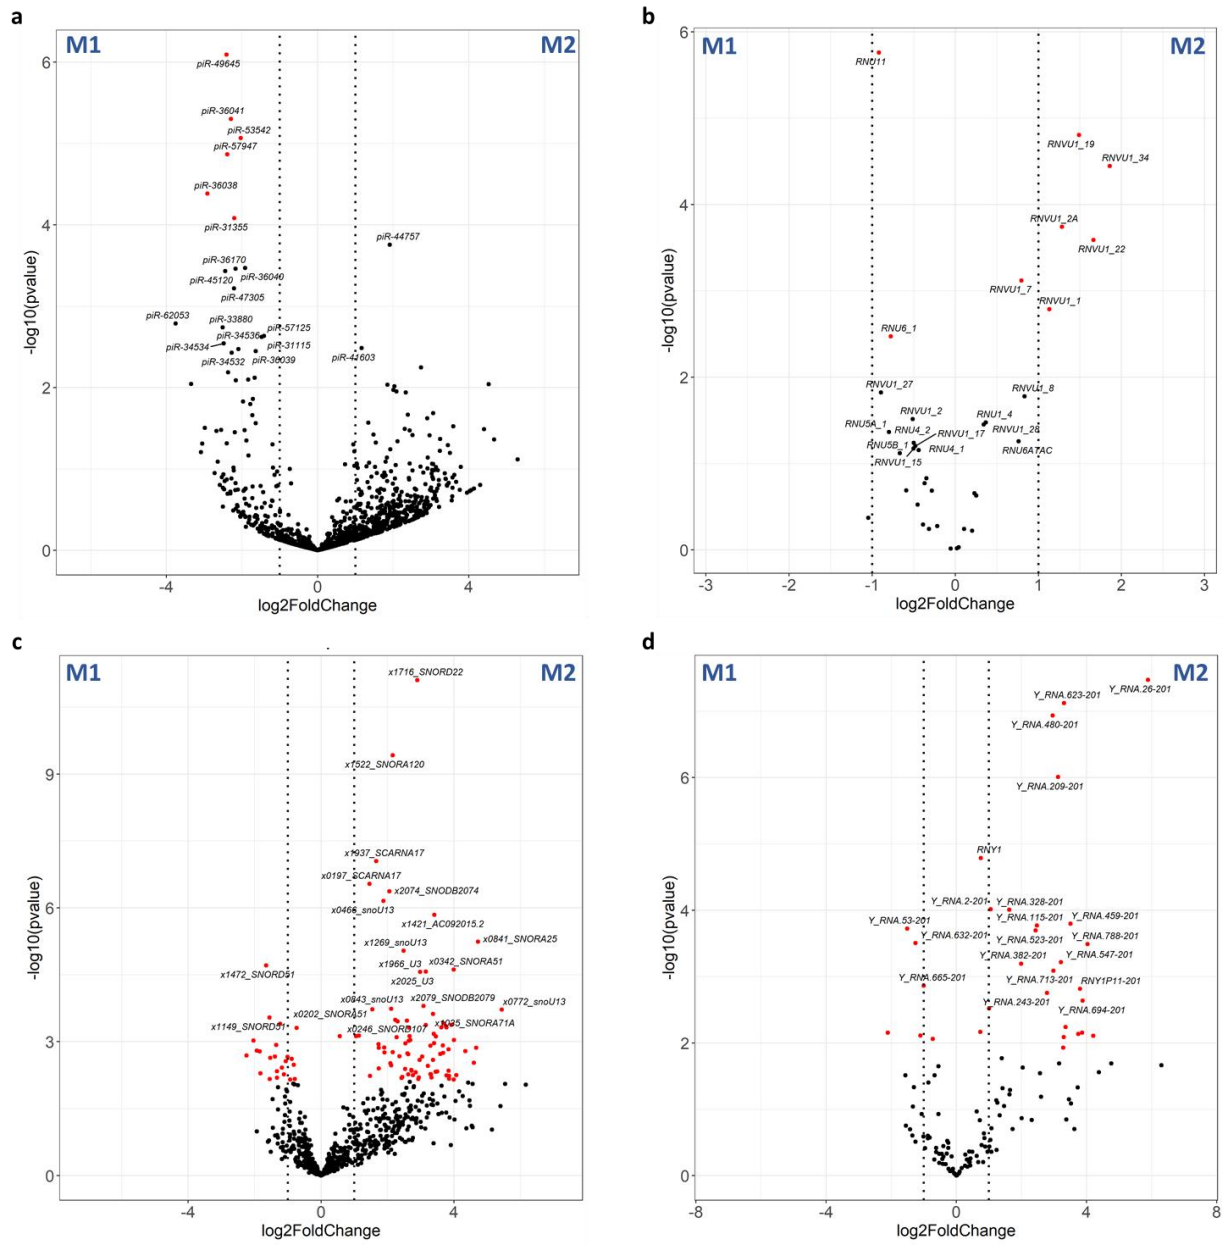

Source: http://biorxiv.org/content/10.1101/2022.08.19.504493v1.full.pdf
